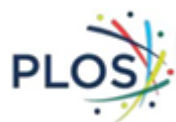

1 **Diabetes, glycaemic profile and risk of vitiligo: a Mendelian**  
2 **randomisation study**

3 **Shucheng Hu<sup>1†</sup>, Yuhui Che<sup>1†</sup>, Jiaying Cai<sup>2</sup>,Jing Guo<sup>3\*</sup> Jinhao**  
4 **Zeng<sup>3</sup>**

5 **1Chengdu University of Traditional Chinese Medicine, Chengdu, China**

6 **2Hospital of Chengdu University of Traditional Chinese Medicine, Chengdu,**  
7 **China**

8 **\* Correspondence:**

9 **Shucheng Hu,**

10 **Hushucheng031123@163.com**

11 **Jing Guo,**

12 **guojing66@cdutcm.edu.cn**

13 **Abstract**

14 **Objectives:**

15 **Previous observational studies have shown that vitiligo usually co-manifests with**  
16 **a variety of dysglycemic diseases, such as Type 1 diabetes mellitus(T1DM) and**  
17 **Type 2 diabetes mellitus(T2DM). Mendelian randomization analysis was**  
18 **performed to further evaluate the causal association between fasting plasma**  
19 **glucose, glycosylated hemoglobin(HbA1c),T1DM,T2DM and vitiligo.**

20 **Methods:**

21 **We used aggregated genome-wide association data from the (Integrative**

22 **Epidemiology Unit) IEU online database of European adults vitiligo; Glycated**

NOTE: This preprint reports new research that has not been certified by peer review and should not be used to guide clinical practice.

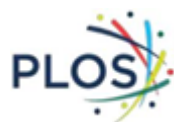

23 **hemoglobin (HbA1c) data were from (IEU). Fasting blood glucose data were**  
24 **obtained from the European Bioinformatics Institute(EBI). T1DM and T2DM**  
25 **data were from FinnGen(FINN).**

26 **We used bidirectional two-sample and multivariate Mendelian randomization**  
27 **analyses to test whether dysglycemic measures (fasting blood glucose, HbA1c),**  
28 **diabetes-related measures (T1DM, T2DM) are causatively associated with**  
29 **vitiligo. IVW method was used as the main test method, MR-Egger, Weighted**  
30 **mode and Weighted median were used as supplementary methods.**

### 31 **Results:**

32 **We found no statistically significant evidence to support a causal association**  
33 **between dysglycemic traits and vitiligo, but in the correlation analysis of diabetic**  
34 **traits, our data supported a positive causal association between T1DM and**  
35 **vitiligo (p=0.018; 95%OR:1.000(1.000-1.000)); In the follow-up multivariate MR**  
36 **Analysis, our results still supported this conclusion (p=0.016, 95% OR=**  
37 **1.000(1.000-1.000)), and suggested that Hba1c was not a mediator of T1DM**  
38 **affecting the pathogenesis of vitiligo. No reverse causality was found in any of the**  
39 **reverse MR Analyses of dysglycemic traits and diabetic traits.**

### 40 **Conclusions:**

41 **Our findings support that T1DM is a risk factor for the development of vitiligo,**  
42 **and this conclusion may explain why the co-presentation of T1DM and vitiligo is**  
43 **often seen in observational studies. Clinical use of measures related to T1DM**  
44 **may be a new idea for the prevention or treatment of vitiligo.**



45 **Key Words: Vitiligo; Abnormal blood glucose traits; Type 1 diabetes mellitus;**  
46 **Type 2 diabetes mellitus; Mendelian randomization**

## 47 **Introduction.**

48 **Vitiligo is a pigment-loss disorder with a global incidence of about 1%(1). In**  
49 **addition to affecting the appearance, vitiligo can also lead to the disorder of the**  
50 **patient's autoimmune system. The risk of autoimmune diseases in vitiligo patients**  
51 **is significantly higher than that in normal people. For example, several controlled**  
52 **trials(2) have been conducted in East Asian and African populations, Chang**  
53 **etal.(3) found that the incidence of diabetes in patients with vitiligo was**  
54 **significantly higher than that in normal people, and believed that there was a**  
55 **correlation effect between vitiligo and diabetes, but the causal relationship was not**  
56 **clear. Such a conclusion is not confirmed only at the individual level. Existing**  
57 **studies (4)have shown that in the peripheral blood and skin tissue fluid of patients**  
58 **with vitiligo, the levels of pro-inflammatory cytokines IL-6, IL- $\beta$ , TNF- $\alpha$  and CD8**  
59 **cells are increased, while the related indicators in patients with diabetes also have**  
60 **an increasing trend. It is not a coincidence that the levels of inflammatory**  
61 **cytokines such as IL-6 and CD8 cells are often increased in the peripheral blood**  
62 **of patients with diabetes. At the big data analysis level, a meta-analysis(3) showed**  
63 **that vitiligo was significantly associated with diabetes (OR 2.515, 95% CI 1.972-**  
64 **3.208; p: 0.001). However, it is not clear whether there is a causal relationship**  
65 **between vitiligo and diabetes.**

66 **Although a number of studies have shown that factors such as blood glucose**



67 **characteristics and diabetes mellitus are associated with the occurrence of vitiligo,**  
68 **the current studies are mainly observational studies, and the results are**  
69 **susceptible to confounding factors and reverse causality. For diabetic features, the**  
70 **causal inference between blood glucose features and vitiligo is less convincing. The**  
71 **MR Method can effectively avoid the interference of confounding factors and**  
72 **reverse causality.**

73 **Understanding the causal relationship between vitiligo and diabetes mellitus can**  
74 **help us prevent or treat the occurrence of diabetes in vitiligo patients, so it is of**  
75 **practical significance to explore the causal relationship between vitiligo and**  
76 **diabetes.**

77 **Mendelian randomization (5) is a data-analysis method that uses genetic variables**  
78 **as instrumental variables for exposure in order to study causal associations**  
79 **between exposure and outcomes. It was first proposed by Katan(6) in 1986.**  
80 **Because the genetic alleles associated with exposure follow the Mendelian**  
81 **inheritance law and are randomly combined at the time of conception, MR**  
82 **Analysis can greatly avoid the interference of environmental factors and other**  
83 **diseases, thereby enhancing the inference of causal association of exposure**  
84 **outcomes(7). Therefore, we conducted a two-sample Mendelian randomization**  
85 **(TSMR) study to investigate the causal relationship between levels of fasting**  
86 **plasma glucose, glycosylated hemoglobin, type 1 diabetes mellitus, type 2 diabetes**  
87 **mellitus and vitiligo.**

88 **Materials and Methods.**



## 89 **Study Design**

90 **The study adhered to Enhanced Reporting of Observational studies in**  
91 **epidemiology (8)- Guidelines for reporting Mendelian randomization. The study**  
92 **design is shown in S 1 Fig. Study design and workflow.In order to explore the**  
93 **causal relationship between blood glucose characteristics (including fasting blood**  
94 **glucose and glycosylated hemoglobin), diabetes characteristics (including type 1**  
95 **diabetes, type 2 diabetes) and vitiligo, we performed a total of three MR Analyses.**  
96 **First, we used univariate Mendelian randomization to investigate the overall effect**  
97 **of blood glucose and diabetes characteristics on vitiligo outcome and performed**  
98 **an inverse MR Analysis to investigate the effect of vitiligo on dysglycemia and the**  
99 **onset of type T1 and T2DM. On this basis, multivariable MR Models were**  
100 **constructed to analyze the direct or independent effects of Hba1c, T1DM, and**  
101 **other characteristics on outcomes. The model was developed to determine the**  
102 **major factors affecting the prognosis of vitiligo, At present, some studies(9-11)**  
103 **have suggested that glycosylated hemoglobin has statistical significance in**  
104 **peripheral blood of vitiligo patients, and glycosylated hemoglobin is one of the**  
105 **indicators of type 1 diabetes.**

106

107 **S1fig. Study design and workflow.**

## 108 **Data sources**

109 **Our study used publicly available GWAS data for which informed consent and**  
110 **ethical approval had previously been obtained. We used aggregated genome-wide**

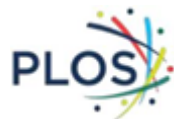

111 association data from the (Integrative Epidemiology Unit) IEU online database of  
 112 European adults vitiligo; Glycated hemoglobin (HbA1c) data were from (IEU).  
 113 Fasting blood glucose data were obtained from the European Bioinformatics  
 114 Institute(EBI). T1DM and T2DM data were from FinnGen(FINN).Detailed  
 115 GWAS data are shown in the table below (S1 Table1).

116 **Supplementary Table 1.Data Source**

| Trait                                           | Year | Consortium                    | Sample size | Number of SNPs |
|-------------------------------------------------|------|-------------------------------|-------------|----------------|
| HbA1c                                           | 2022 | Within family GWAS consortium | 45734       | 9696819        |
| Fasting glucose                                 | 2021 | NA                            | 200622      | 31008728       |
| Type 1 diabetes                                 | 2021 | NA                            | —           | 16380008       |
| Type 2 diabetes                                 | 2021 | NA                            | —           | 16380440       |
| Non-cancer illness code self-reported: vitiligo | 2017 | Neale Lab                     | 337159      | 10894596       |

117

### 118 **Instrumental variable selection**

119 The selection of instrumental variables generally needs to meet the following three  
 120 assumptions(12):

121 1. Correlation hypothesis; The instrumental variable must have a strong  
 122 association with the exposure ( $p$  value  $< 0.05$ ).

123 2. Assumption of independence; Instrumental variables were not associated with  
 124 confounders.

125 3. Assumption of exclusivity; Instrumental variables can only affect outcomes



126 through exposure and cannot be directly correlated with outcomes.

127 In the univariate Mendelian randomization phase, we first tested for horizontal  
128 pleiotropy of exposures and outcomes and ensured that assumptions of  
129 independence were valid (linkage disequilibrium, LD cluster  $r^2$  threshold of 0.001  
130 and window size of 10 Mb). If the IVW test results were relevant (p value < 0.05),  
131 we performed sensitivity analyses for each trait.

132 For multivariable Mendelian randomization, we constructed a multivariable  
133 Mendelian randomization model using type 1 diabetes mellitus, glycated  
134 hemoglobin, and vitiligo. SNPs for these traits were combined to remove  
135 confounding factors. To avoid bias caused by potentially weak instrumental  
136 variables, we used the F-statistic (calculated by the formula  $F = \beta^2 / se^2$ ) to  
137 evaluate the strength of IV. If the F-statistic > 10, then the correlation between IV  
138 and exposure is considered strong enough to guarantee that the results of the MR  
139 Analysis are protected from weak instrumental variable bias(13).

## 140 MR Analysis

141 In univariate MR Analysis, we used the IVW method as our primary test and  
142 performed sensitivity tests, such as MR-Egger(14); Weighted Median(15);  
143 Weighted Mode(16); MR-MR-PRESSO(17) was used to check for heterogeneity  
144 and horizontal pleiotropy to help inform confidence in the results. On this basis,  
145 we performed reverse MR Analysis. Specific methodological procedures were the  
146 same as for univariate MR Analysis. On the basis of univariate MR Analysis,  
147 multivariate MR Models were constructed for abnormal blood glucose, type 1

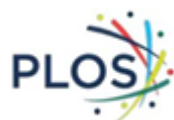

148 **diabetes mellitus, type 2 diabetes mellitus and vitiligo. A total of 42 nSNPs were**  
149 **extracted, and after harmonise was performed to remove unmatchable SNPs, 32**  
150 **SNPs were retained for multivariate MR Analysis. At equilibrium, the Inverse-**  
151 **Variance Weighted(IVW) method was still used as the main method to test the**  
152 **results, and in the case of positive results, we used multivariate MR-Egger**  
153 **(intercept), MR-PRESSO, and Weighted Mode to test for heterogeneity and**  
154 **horizontal pleiotropy of multivariate results, and heterogeneity, defined as**  
155 **variation in causal estimates of different SNPs, was used to assess heterogeneity of**  
156 **different SNPs in multivariate MR.**

## 157 **Results.**

158 **The data selected for this study were all from the European population, and the**  
159 **number of instrumental variables and their correlations are shown in S2-S3**  
160 **Tables. In univariate MR Analysis, F statistics for all SNPs were > 10, a result that**  
161 **suggests no potential causal bias in the data.**

162 **Supplementary Table 2.Genetic variants that were used as instruments for**  
163 **diabetes traits and blood sugar traits**

| SNP    | Chr | Pos    | Effect | Effect | Beta | SE     | P      | F    |
|--------|-----|--------|--------|--------|------|--------|--------|------|
|        |     |        | Allele | Allele |      |        | value  |      |
|        |     |        |        | Frequ  |      |        |        |      |
|        |     |        |        | ency   |      |        |        |      |
| rs1160 | 2   | 165508 | T      | 0.3576 | -    | 0.0108 | 7.3090 | 38.2 |



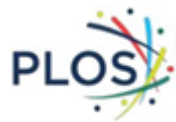

|               |           |               |          |               |               |               |               |             |
|---------------|-----------|---------------|----------|---------------|---------------|---------------|---------------|-------------|
| <b>39340</b>  |           | <b>389</b>    |          |               | <b>0.0668</b> |               | <b>3E-10</b>  | <b>5652</b> |
| <b>rs1611</b> | <b>19</b> | <b>461570</b> | <b>C</b> | <b>0.4465</b> | <b>-</b>      | <b>0.0105</b> | <b>1.3910</b> | <b>31.8</b> |
| <b>236</b>    |           | <b>04</b>     |          |               | <b>0.0593</b> |               | <b>1E-08</b>  | <b>956</b>  |
| <b>rs1836</b> | <b>11</b> | <b>927087</b> | <b>G</b> | <b>0.3567</b> | <b>0.1183</b> | <b>0.0108</b> | <b>8.9166</b> | <b>119.</b> |
| <b>97542</b>  |           | <b>10</b>     |          |               |               |               | <b>1E-28</b>  | <b>9836</b> |
| <b>rs3129</b> | <b>10</b> | <b>944606</b> | <b>C</b> | <b>0.4769</b> | <b>-</b>      | <b>0.0104</b> | <b>3.2077</b> | <b>61.8</b> |
| <b>871</b>    |           | <b>50</b>     |          |               | <b>0.0818</b> |               | <b>5E-15</b>  | <b>6428</b> |
| <b>rs3184</b> | <b>4</b>  | <b>451825</b> | <b>G</b> | <b>0.4736</b> | <b>0.0682</b> | <b>0.0104</b> | <b>5.1999</b> | <b>43.0</b> |
| <b>504</b>    |           | <b>27</b>     |          |               |               |               | <b>6E-11</b>  | <b>0333</b> |
| <b>rs3433</b> | <b>9</b>  | <b>221326</b> | <b>C</b> | <b>0.1518</b> | <b>-</b>      | <b>0.0145</b> | <b>1.6398</b> | <b>77.4</b> |
| <b>7125</b>   |           | <b>98</b>     |          |               | <b>0.1276</b> |               | <b>3E-18</b>  | <b>4</b>    |
| <b>rs4117</b> | <b>9</b>  | <b>429192</b> | <b>C</b> | <b>0.3757</b> | <b>0.0584</b> | <b>0.0107</b> | <b>4.9039</b> | <b>29.7</b> |
| <b>3</b>      |           | <b>8</b>      |          |               |               |               | <b>9E-08</b>  | <b>8915</b> |
| <b>rs6679</b> | <b>12</b> | <b>427108</b> | <b>A</b> | <b>0.0223</b> | <b>-</b>      | <b>0.0365</b> | <b>2.8926</b> | <b>98.5</b> |
| <b>677</b>    |           | <b>8</b>      |          | <b>6</b>      | <b>0.3623</b> |               | <b>8E-23</b>  | <b>2602</b> |
| <b>rs689</b>  | <b>17</b> | <b>361035</b> | <b>A</b> | <b>0.6457</b> | <b>-</b>      | <b>0.0109</b> | <b>3.0549</b> | <b>39.3</b> |
|               |           | <b>65</b>     |          |               | <b>0.0684</b> |               | <b>9E-10</b>  | <b>785</b>  |
| <b>rs7056</b> | <b>6</b>  | <b>327104</b> | <b>C</b> | <b>0.0503</b> | <b>0.3246</b> | <b>0.024</b>  | <b>1.0108</b> | <b>182.</b> |
| <b>99</b>     |           | <b>07</b>     |          | <b>2</b>      |               |               | <b>8E-41</b>  | <b>9256</b> |
| <b>rs7420</b> | <b>8</b>  | <b>118185</b> | <b>G</b> | <b>0.3784</b> | <b>-</b>      | <b>0.0107</b> | <b>1.9019</b> | <b>49.5</b> |
| <b>3920</b>   |           | <b>733</b>    |          |               | <b>0.0753</b> |               | <b>5E-12</b>  | <b>2476</b> |
| <b>rs9275</b> | <b>18</b> | <b>579086</b> | <b>G</b> | <b>0.1947</b> | <b>0.0775</b> | <b>0.0131</b> | <b>3.0049</b> | <b>34.9</b> |

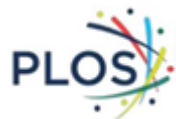

|        |    |        |   |        |        |        |             |
|--------|----|--------|---|--------|--------|--------|-------------|
| 183    |    | 75     |   |        |        | 7E-09  | 9942        |
| rs9468 | 3  | 123365 | A | 0.1706 | -      | 0.0138 | 3.6889 62.0 |
| 618    |    | 07     |   |        | 0.1087 | 3E-15  | 4416        |
| rs1244 | 16 | 772619 | G | 0.0584 | 0.1342 | 0.0223 | 1.6199 36.2 |
| 9219   |    | 43     |   | 1      |        | 8E-09  | 1557        |
| rs1314 | 4  | 631540 | G | 0.5422 | 0.0789 | 0.0104 | 3.9774 57.5 |
| 3143   |    | 6      |   |        |        | 1E-14  | 5557        |
| rs1396 | 2  | 593140 | C | 0.4088 | -      | 0.0106 | 4.2419 29.7 |
| 40586  |    | 86     |   |        | 0.0578 | 9E-08  | 3336        |
| rs1397 | 12 | 715266 | G | 0.4275 | -      | 0.0105 | 1.2489 32.2 |
| 566    |    | 77     |   |        | 0.0596 | 9E-08  | 1914        |
| rs1441 | 10 | 114737 | T | 0.0235 | -      | 0.0345 | 8.8691 37.6 |
| 55527  |    | 633    |   | 6      | 0.2116 | 1E-10  | 1778        |
| rs1703 | 2  | 605535 | A | 0.0476 | 0.1481 | 0.0243 | 1.1620 37.1 |
| 9732   |    | 19     |   |        |        | 1E-09  | 4476        |
| rs1815 | 6  | 724545 | G | 0.4053 | 0.062  | 0.0106 | 5.2100 34.2 |
| 311    |    | 8      |   |        |        | 3E-09  | 1146        |
| rs1827 | 10 | 714498 | T | 0.0387 | 0.1488 | 0.0269 | 3.155E 30.5 |
| 88819  |    | 78     |   | 3      |        | -08    | 9858        |
| rs1933 | 6  | 140291 | T | 0.1913 | -      | 0.0132 | 4.9029 34.3 |
| 742    |    | 319    |   |        | 0.0774 | 8E-09  | 8223        |
| rs2303 | 19 | 797652 | C | 0.6741 | -      | 0.0111 | 5.0750 34.1 |



|        |    |        |   |        |        |        |             |
|--------|----|--------|---|--------|--------|--------|-------------|
| 700    |    | 9      |   | 0.0649 |        | 5E-09  | 8562        |
| rs2583 | 12 | 661704 | C | 0.0563 | 0.1526 | 0.0226 | 1.4481 45.5 |
| 921    |    | 81     |   | 1      |        | E-11   | 9237        |
| rs2864 | 9  | 139248 | G | 0.6974 | 0.1005 | 0.0113 | 6.2459 79.0 |
| 2213   |    | 082    |   |        |        | 7E-19  | 9977        |
| rs2943 | 2  | 227121 | G | 0.6174 | 0.0752 | 0.0107 | 1.7151 49.3 |
| 656    |    | 918    |   |        |        | 4E-12  | 9331        |
| rs3110 | 17 | 360474 | G | 0.7867 | 0.0715 | 0.0128 | 2.5080 31.2 |
| 641    |    | 17     |   |        |        | 1E-08  | 027         |
| rs3487 | 10 | 114754 | C | 0.2016 | 0.2962 | 0.0131 | 1.1722 511. |
| 2471   |    | 071    |   |        |        | E-112  | 2432        |
| rs3887 | 3  | 186665 | T | 0.463  | 0.0591 | 0.0104 | 1.3949 32.2 |
| 925    |    | 645    |   |        |        | 9E-08  | 9299        |
| rs4293 | 19 | 454119 | C | 0.1825 | -      | 0.0136 | 1.6330 36.4 |
| 58     |    | 41     |   |        | 0.0821 | 1E-09  | 4253        |
| rs4555 | 20 | 576073 | T | 0.0499 | -      | 0.0243 | 5.4954 93.1 |
| 1238   |    | 63     |   | 1      | 0.2345 | 1E-22  | 2647        |
| rs4931 | 12 | 326908 | G | 0.6926 | 0.0625 | 0.0113 | 3.0719 30.5 |
| 017    |    | 57     |   |        |        | 9E-08  | 9167        |
| rs4984 | 7  | 282562 | A | 0.6448 | -      | 0.0108 | 8.2729 33.4 |
| 75     |    | 40     |   |        | 0.0625 | 4E-09  | 898         |
| rs5215 | 11 | 174086 | T | 0.5284 | -      | 0.0104 | 1.6230 31.7 |



|               |           |               |          |               |               |               |               |             |
|---------------|-----------|---------------|----------|---------------|---------------|---------------|---------------|-------------|
|               |           | <b>30</b>     |          |               | <b>0.0586</b> |               | <b>1E-08</b>  | <b>4889</b> |
| <b>rs5599</b> | <b>16</b> | <b>752367</b> | <b>G</b> | <b>0.0871</b> | <b>-</b>      | <b>0.0185</b> | <b>5.5962</b> | <b>61.3</b> |
| <b>3634</b>   |           | <b>63</b>     |          | <b>7</b>      | <b>0.1449</b> |               | <b>9E-15</b>  | <b>47</b>   |
| <b>rs5634</b> | <b>12</b> | <b>121432</b> | <b>C</b> | <b>0.2827</b> | <b>-</b>      | <b>0.0116</b> | <b>1.2471</b> | <b>45.9</b> |
| <b>8580</b>   |           | <b>117</b>    |          |               | <b>0.0786</b> |               | <b>E-11</b>   | <b>1231</b> |
| <b>rs5810</b> | <b>15</b> | <b>778928</b> | <b>G</b> | <b>0.4094</b> | <b>-0.06</b>  | <b>0.0106</b> | <b>1.4119</b> | <b>32.0</b> |
| <b>2377</b>   |           | <b>57</b>     |          |               |               |               | <b>8E-08</b>  | <b>3987</b> |
| <b>rs6073</b> | <b>20</b> | <b>428880</b> | <b>G</b> | <b>0.0366</b> | <b>0.179</b>  | <b>0.0273</b> | <b>5.9251</b> | <b>42.9</b> |
| <b>386</b>    |           | <b>82</b>     |          | <b>7</b>      |               |               | <b>6E-11</b>  | <b>9132</b> |
| <b>rs6213</b> | <b>2</b>  | <b>434802</b> | <b>T</b> | <b>0.0489</b> | <b>0.1422</b> | <b>0.0239</b> | <b>2.5719</b> | <b>35.4</b> |
| <b>7406</b>   |           | <b>21</b>     |          | <b>6</b>      |               |               | <b>9E-09</b>  | <b>0001</b> |
| <b>rs6249</b> | <b>7</b>  | <b>150537</b> | <b>A</b> | <b>0.3402</b> | <b>0.074</b>  | <b>0.011</b>  | <b>1.5219</b> | <b>45.2</b> |
| <b>2368</b>   |           | <b>635</b>    |          |               |               |               | <b>5E-11</b>  | <b>562</b>  |
| <b>rs6550</b> | <b>3</b>  | <b>234076</b> | <b>C</b> | <b>0.8216</b> | <b>-</b>      | <b>0.0135</b> | <b>1.048E</b> | <b>37.4</b> |
| <b>758</b>    |           | <b>58</b>     |          |               | <b>0.0826</b> |               | <b>-09</b>    | <b>3627</b> |
| <b>rs6780</b> | <b>3</b>  | <b>185503</b> | <b>A</b> | <b>0.3066</b> | <b>0.0929</b> | <b>0.0112</b> | <b>1.2240</b> | <b>68.8</b> |
| <b>171</b>    |           | <b>456</b>    |          |               |               |               | <b>5E-16</b>  | <b>011</b>  |
| <b>rs6786</b> | <b>3</b>  | <b>170629</b> | <b>A</b> | <b>0.681</b>  | <b>0.0654</b> | <b>0.0111</b> | <b>4.1750</b> | <b>34.7</b> |
| <b>846</b>    |           | <b>884</b>    |          |               |               |               | <b>3E-09</b>  | <b>1439</b> |
| <b>rs7018</b> | <b>9</b>  | <b>221376</b> | <b>G</b> | <b>0.279</b>  | <b>0.1126</b> | <b>0.0116</b> | <b>2.5310</b> | <b>94.2</b> |
| <b>475</b>    |           | <b>85</b>     |          |               |               |               | <b>5E-22</b>  | <b>2384</b> |
| <b>rs7109</b> | <b>11</b> | <b>724634</b> | <b>A</b> | <b>0.2374</b> | <b>-</b>      | <b>0.0122</b> | <b>3.8806</b> | <b>57.7</b> |



|        |    |        |   |        |        |        |        |      |
|--------|----|--------|---|--------|--------|--------|--------|------|
| 575    |    | 35     |   |        | 0.0927 |        | 1E-14  | 3508 |
| rs7133 | 3  | 123124 | A | 0.1878 | -0.086 | 0.0133 | 1.0990 | 41.8 |
| 0995   |    | 513    |   |        |        |        | 1E-10  | 113  |
| rs7486 | 12 | 436557 | T | 0.0195 | -      | 0.0388 | 6.8754 | 42.5 |
| 2545   |    | 2      |   |        | 0.2531 |        | 3E-11  | 5208 |
| rs7617 | 5  | 102143 | A | 0.0578 | 0.1409 | 0.0222 | 2.3219 | 40.2 |
| 7300   |    | 311    |   | 4      |        |        | 9E-10  | 8246 |
| rs7689 | 12 | 438484 | G | 0.0311 | -      | 0.0325 | 2.9302 | 221. |
| 5963   |    | 4      |   | 6      | 0.4842 |        | 2E-50  | 9642 |
| rs7765 | 7  | 102086 | T | 0.1835 | 0.0968 | 0.0134 | 6.0841 | 52.1 |
| 5131   |    | 552    |   |        |        |        | 5E-13  | 8445 |
| rs7847 | 12 | 452151 | A | 0.0394 | -      | 0.0273 | 4.3261 | 70.6 |
| 0967   |    | 1      |   | 4      | 0.2295 |        | 3E-17  | 7081 |
| rs7998 | 13 | 807186 | A | 0.3894 | -      | 0.0107 | 1.0690 | 46.1 |
| 259    |    | 54     |   |        | 0.0727 |        | 5E-11  | 6377 |
| rs8353 | 22 | 207961 | T | 0.3009 | -      | 0.0113 | 1.3399 | 36.8 |
|        |    | 17     |   |        | 0.0686 |        | 9E-09  | 5457 |
| rs8785 | 7  | 442556 | A | 0.2071 | 0.0784 | 0.0128 | 8.9400 | 37.5 |
| 21     |    | 43     |   |        |        |        | 5E-10  | 1563 |
| rs9348 | 6  | 206806 | A | 0.3289 | 0.123  | 0.011  | 4.9113 | 125. |
| 441    |    | 78     |   |        |        |        | 4E-29  | 0331 |
| rs9933 | 16 | 538181 | C | 0.4129 | 0.1161 | 0.0105 | 2.6242 | 122. |



|        |    |        |   |       |        |        |        |      |
|--------|----|--------|---|-------|--------|--------|--------|------|
| 509    |    | 67     |   |       |        |        | 2E-28  | 2604 |
| rs1030 | 6  | 390340 | T | 0.065 | 0.0235 | 0.0032 | 1.2089 | 53.9 |
| 5457   |    | 95     |   |       |        |        | 3E-14  | 3066 |
| rs1057 | 2  | 273240 | A | 0.625 | -      | 0.0018 | 1.9111 | 47.4 |
| 394    |    | 36     |   |       | 0.0124 |        | 7E-12  | 5679 |
| rs1081 | 9  | 221340 | A | 0.165 | -      | 0.0022 | 7.9378 | 102. |
| 1660   |    | 68     |   |       | 0.0223 |        | E-25   | 7459 |
| rs1083 | 11 | 927087 | G | 0.286 | 0.0772 | 0.0019 | 1E-200 | 1650 |
| 0963   |    | 10     |   |       |        |        |        | .925 |
| rs1083 | 11 | 458701 | G | 0.52  | -      | 0.0016 | 1.5588 | 221. |
| 8524   |    | 77     |   |       | 0.0238 |        | 3E-40  | 2656 |
| rs1083 | 11 | 473505 | C | 0.314 | 0.0177 | 0.0018 | 3.4419 | 96.6 |
| 8693   |    | 53     |   |       |        |        | 1E-23  | 9444 |
| rs1097 | 9  | 429192 | C | 0.38  | 0.0198 | 0.0017 | 9.8469 | 135. |
| 4438   |    | 8      |   |       |        |        | 1E-31  | 654  |
| rs1160 | 11 | 724606 | C | 0.168 | -      | 0.0022 | 3.1160 | 115. |
| 3349   |    | 94     |   |       | 0.0236 |        | 2E-25  | 0744 |
| rs1161 | 12 | 133063 | A | 0.454 | 0.0144 | 0.0019 | 3.2598 | 57.4 |
| 0045   |    | 768    |   |       |        |        | 7E-13  | 4044 |
| rs1161 | 13 | 284875 | G | 0.234 | 0.0173 | 0.002  | 3.4119 | 74.8 |
| 9319   |    | 99     |   |       |        |        | 3E-20  | 225  |
| rs1170 | 3  | 123065 | G | 0.177 | -      | 0.002  | 1.6259 | 197. |



|               |           |               |          |              |               |               |               |              |
|---------------|-----------|---------------|----------|--------------|---------------|---------------|---------------|--------------|
| <b>8067</b>   |           | <b>778</b>    |          |              | <b>0.0281</b> |               | <b>2E-43</b>  | <b>4025</b>  |
| <b>rs1205</b> | <b>6</b>  | <b>153431</b> | <b>T</b> | <b>0.384</b> | <b>0.012</b>  | <b>0.0017</b> | <b>1.166E</b> | <b>49.8</b>  |
| <b>5786</b>   |           | <b>125</b>    |          |              |               |               | <b>-11</b>    | <b>2699</b>  |
| <b>rs1254</b> | <b>8</b>  | <b>810768</b> | <b>T</b> | <b>0.479</b> | <b>0.0118</b> | <b>0.0019</b> | <b>4.5109</b> | <b>38.5</b>  |
| <b>1643</b>   |           | <b>74</b>     |          |              |               |               | <b>7E-09</b>  | <b>7064</b>  |
| <b>rs1260</b> | <b>2</b>  | <b>277309</b> | <b>C</b> | <b>0.587</b> | <b>0.0282</b> | <b>0.0017</b> | <b>4.4812</b> | <b>275.</b>  |
| <b>326</b>    |           | <b>40</b>     |          |              |               |               | <b>6E-65</b>  | <b>1696</b>  |
| <b>rs1278</b> | <b>10</b> | <b>113036</b> | <b>G</b> | <b>0.076</b> | <b>-</b>      | <b>0.003</b>  | <b>2.8628</b> | <b>120.</b>  |
| <b>4552</b>   |           | <b>354</b>    |          |              |               |               | <b>0.0329</b> | <b>6E-31</b> |
| <b>rs1288</b> | <b>14</b> | <b>100830</b> | <b>A</b> | <b>0.189</b> | <b>-</b>      | <b>0.002</b>  | <b>6.0186</b> | <b>45.5</b>  |
| <b>8855</b>   |           | <b>818</b>    |          |              |               |               | <b>0.0135</b> | <b>6E-12</b> |
| <b>rs1289</b> | <b>15</b> | <b>750903</b> | <b>T</b> | <b>0.598</b> | <b>-</b>      | <b>0.0017</b> | <b>4.6409</b> | <b>33.2</b>  |
| <b>8997</b>   |           | <b>49</b>     |          |              |               |               | <b>0.0098</b> | <b>8E-09</b> |
| <b>rs1575</b> | <b>5</b>  | <b>558091</b> | <b>C</b> | <b>0.27</b>  | <b>-</b>      | <b>0.0021</b> | <b>5.426E</b> | <b>40.7</b>  |
| <b>12</b>     |           | <b>27</b>     |          |              |               |               | <b>0.0134</b> | <b>-10</b>   |
| <b>rs1604</b> | <b>3</b>  | <b>170709</b> | <b>T</b> | <b>0.288</b> | <b>-</b>      | <b>0.0018</b> | <b>4.4678</b> | <b>121</b>   |
| <b>038</b>    |           | <b>193</b>    |          |              |               |               | <b>0.0198</b> | <b>6E-28</b> |
| <b>rs1685</b> | <b>3</b>  | <b>141134</b> | <b>G</b> | <b>0.045</b> | <b>-</b>      | <b>0.0042</b> | <b>1.2600</b> | <b>60.6</b>  |
| <b>1397</b>   |           | <b>818</b>    |          |              |               |               | <b>0.0327</b> | <b>9E-12</b> |
| <b>rs1691</b> | <b>9</b>  | <b>111680</b> | <b>G</b> | <b>0.029</b> | <b>-</b>      | <b>0.0049</b> | <b>2.8196</b> | <b>64.6</b>  |
| <b>3693</b>   |           | <b>359</b>    |          |              |               |               | <b>0.0394</b> | <b>8E-16</b> |
| <b>rs1716</b> | <b>7</b>  | <b>148982</b> | <b>T</b> | <b>0.176</b> | <b>0.028</b>  | <b>0.0021</b> | <b>4.1696</b> | <b>177.</b>  |

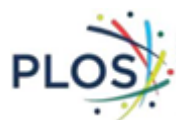

|        |    |        |   |       |        |        |        |      |
|--------|----|--------|---|-------|--------|--------|--------|------|
| 8486   |    | 82     |   |       |        |        | 5E-36  | 7778 |
| rs1726 | 20 | 398326 | C | 0.204 | 0.0158 | 0.0021 | 5.1015 | 56.6 |
| 5513   |    | 28     |   |       |        |        | 2E-14  | 0771 |
| rs1727 | 15 | 608625 | G | 0.24  | 0.0104 | 0.0021 | 3.6160 | 24.5 |
| 0243   |    | 00     |   |       |        |        | 1E-08  | 2608 |
| rs1743 | 3  | 152180 | T | 0.11  | -      | 0.0032 | 3.3309 | 29.9 |
| 7560   |    | 329    |   |       | 0.0175 |        | 6E-08  | 0723 |
| rs1745 | 11 | 616097 | T | 0.375 | -      | 0.0017 | 3.3713 | 97.6 |
| 83     |    | 50     |   |       | 0.0168 |        | 2E-22  | 609  |
| rs1820 | 5  | 956965 | C | 0.296 | -      | 0.002  | 1.9050 | 152. |
| 176    |    | 85     |   |       | 0.0247 |        | 2E-34  | 5225 |
| rs1895 | 2  | 549411 | A | 0.723 | -      | 0.002  | 2.8109 | 37.8 |
| 48     |    | 12     |   |       | 0.0123 |        | 9E-09  | 225  |
| rs1945 | 7  | 898531 | A | 0.52  | 0.0102 | 0.0018 | 8.7570 | 32.1 |
| 18     |    | 49     |   |       |        |        | 9E-09  | 1111 |
| rs2075 | 1  | 214154 | T | 0.376 | -      | 0.0017 | 3.1827 | 89.6 |
| 423    |    | 719    |   |       | 0.0161 |        | 3E-21  | 9204 |
| rs2238 | 16 | 401428 | G | 0.619 | -      | 0.0019 | 3.8240 | 34.7 |
| 435    |    | 2      |   |       | 0.0112 |        | 2E-09  | 4792 |
| rs2461 | 2  | 169700 | C | 0.852 | -      | 0.0024 | 2.7302 | 81.7 |
| 385    |    | 463    |   |       | 0.0217 |        | 3E-19  | 5174 |
| rs2595 | 7  | 441485 | G | 0.683 | -      | 0.0021 | 4.4781 | 81   |





|        |    |        |   |       |        |        |        |      |
|--------|----|--------|---|-------|--------|--------|--------|------|
| 701    |    | 53     |   |       | 0.0189 |        | 6E-19  |      |
| rs2657 | 12 | 568653 | G | 0.202 | 0.0119 | 0.0022 | 7.3339 | 29.2 |
| 879    |    | 38     |   |       |        |        | 8E-09  | 5826 |
| rs2839 | 10 | 265058 | A | 0.164 | -0.016 | 0.0022 | 8.3791 | 52.8 |
| 671    |    | 22     |   |       |        |        | 5E-14  | 9256 |
| rs3483 | 1  | 229672 | A | 0.631 | -      | 0.002  | 3.0359 | 37.2 |
| 30     |    | 955    |   |       | 0.0122 |        | 9E-10  | 1    |
| rs3588 | 14 | 900554 | T | 0.617 | -0.013 | 0.0019 | 3.3650 | 46.8 |
| 9227   |    | 68     |   |       |        |        | 4E-10  | 144  |
| rs3778 | 6  | 725027 | A | 0.176 | -      | 0.0021 | 3.1571 | 78.4 |
| 321    |    | 0      |   |       | 0.0186 |        | 8E-17  | 4898 |
| rs3829 | 9  | 139256 | A | 0.276 | -      | 0.002  | 1.0869 | 66.4 |
| 109    |    | 766    |   |       | 0.0163 |        | 3E-15  | 225  |
| rs3842 | 11 | 218106 | G | 0.72  | -      | 0.0022 | 2.8409 | 37.0 |
| 753    |    | 0      |   |       | 0.0134 |        | 9E-09  | 9917 |
| rs3971 | 22 | 303431 | T | 0.062 | -      | 0.0031 | 1.7670 | 29.7 |
| 3      |    | 86     |   |       | 0.0169 |        | 1E-08  | 2008 |
| rs4760 | 12 | 577711 | A | 0.181 | -0.011 | 0.002  | 3.3309 | 30.2 |
| 278    |    | 53     |   |       |        |        | 6E-08  | 5    |
| rs4862 | 4  | 185726 | T | 0.401 | 0.0123 | 0.0019 | 4.4470 | 41.9 |
| 423    |    | 548    |   |       |        |        | 3E-10  | 0859 |
| rs5076 | 9  | 136149 | A | 0.189 | 0.0164 | 0.0021 | 6.9919 | 60.9 |



|        |    |        |   |       |        |        |        |      |
|--------|----|--------|---|-------|--------|--------|--------|------|
| 66     |    | 399    |   |       |        |        | 8E-17  | 8866 |
| rs5371 | 2  | 169774 | T | 0.64  | 0.0663 | 0.0017 | 1E-200 | 1521 |
| 83     |    | 646    |   |       |        |        |        |      |
| rs5892 | 7  | 756545 | T | 0.032 | 0.0306 | 0.0053 | 5.8210 | 33.3 |
| 5536   |    | 74     |   |       |        |        | 3E-09  | 3428 |
| rs6113 | 20 | 225570 | A | 0.066 | -      | 0.0044 | 7.6594 | 92.8 |
| 722    |    | 99     |   |       | 0.0424 |        | 9E-25  | 595  |
| rs6489 | 12 | 121893 | G | 0.512 | 0.011  | 0.0018 | 3.2670 | 37.3 |
| 811    |    | 626    |   |       |        |        | 1E-09  | 4568 |
| rs6538 | 12 | 978489 | G | 0.377 | -      | 0.0019 | 9.4123 | 55.8 |
| 804    |    | 10     |   |       | 0.0142 |        | 9E-14  | 5596 |
| rs6598 | 15 | 992711 | G | 0.648 | -      | 0.0017 | 4.1238 | 44.9 |
| 541    |    | 35     |   |       | 0.0114 |        | 2E-12  | 6886 |
| rs6662 | 1  | 100894 | A | 0.198 | 0.0143 | 0.0023 | 3.3410 | 38.6 |
| 924    |    | 419    |   |       |        |        | 3E-10  | 5595 |
| rs6808 | 3  | 187740 | C | 0.606 | 0.0127 | 0.0017 | 7.2094 | 55.8 |
| 574    |    | 523    |   |       |        |        | 1E-14  | 0969 |
| rs7012 | 8  | 917320 | A | 0.47  | -0.018 | 0.0017 | 9.7454 | 112. |
| 637    |    | 9      |   |       |        |        | 1E-25  | 1107 |
| rs7095 | 10 | 953841 | T | 0.358 | -      | 0.0018 | 1.9760 | 34.6 |
| 788    |    | 52     |   |       | 0.0106 |        | 1E-09  | 7901 |
| rs7163 | 15 | 623916 | T | 0.433 | -      | 0.0016 | 2.6411 | 183. |



|        |    |        |   |       |        |        |        |      |
|--------|----|--------|---|-------|--------|--------|--------|------|
| 757    |    | 08     |   |       | 0.0217 |        | 9E-36  | 9414 |
| rs7178 | 15 | 777471 | G | 0.679 | 0.0121 | 0.0018 | 7.0859 | 45.1 |
| 572    |    | 90     |   |       |        |        | 8E-10  | 8827 |
| rs7708 | 5  | 764258 | A | 0.686 | -      | 0.0019 | 1.253E | 49   |
| 285    |    | 67     |   |       | 0.0133 |        | -09    |      |
| rs7798 | 2  | 437779 | T | 0.055 | -      | 0.0035 | 1.5801 | 49.4 |
| 1966   |    | 64     |   |       | 0.0246 |        | 6E-14  | 0082 |
| rs7813 | 1  | 150868 | A | 0.203 | -      | 0.0022 | 2.5980 | 44.6 |
| 2593   |    | 102    |   |       | 0.0147 |        | 1E-10  | 4669 |
| rs7903 | 10 | 114758 | T | 0.307 | 0.0259 | 0.0019 | 1.9948 | 185. |
| 146    |    | 349    |   |       |        |        | E-35   | 8199 |
| rs8785 | 7  | 442556 | A | 0.249 | 0.0549 | 0.002  | 2.6485 | 753. |
| 21     |    | 43     |   |       |        |        | E-174  | 5025 |
| rs8968 | 8  | 959605 | C | 0.542 | -      | 0.0016 | 5.6120 | 38.2 |
| 54     |    | 11     |   |       | 0.0099 |        | 3E-09  | 8516 |
| rs9348 | 6  | 206806 | A | 0.272 | 0.0176 | 0.0018 | 4.4025 | 95.6 |
| 441    |    | 78     |   |       |        |        | 1E-20  | 0494 |
| rs9650 | 8  | 118204 | T | 0.284 | -      | 0.0018 | 8.3061 | 252. |
| 069    |    | 020    |   |       | 0.0286 |        | 5E-58  | 4568 |
| rs1042 | 19 | 461501 | G |       | -      | 0.0062 | 2.869E | 39.9 |
| 0309   |    | 82     |   |       | 0.0392 |        | -10    | 7503 |
| rs1046 | 17 | 806856 | G |       | -      | 0.007  | 1.4669 | 116. |



|        |    |        |   |        |        |        |      |
|--------|----|--------|---|--------|--------|--------|------|
| 917    |    | 55     |   | 0.0757 |        | E-27   | 9488 |
| rs1096 | 9  | 221328 | C | -      | 0.0084 | 1.8400 | 40.8 |
| 5248   |    | 78     |   | 0.0537 |        | 1E-10  | 6862 |
| rs1106 | 10 | 710188 | G | 0.052  | 0.0067 | 6.1887 | 60.2 |
| 676    |    | 74     |   |        |        | 1E-15  | 3613 |
| rs1170 | 3  | 123065 | G | -      | 0.0073 | 9.5345 | 64   |
| 8067   |    | 778    |   | 0.0584 |        | 5E-16  |      |
| rs1457 | 18 | 437522 | T | -      | 0.0083 | 3.8799 | 30.0 |
| 31180  |    | 67     |   | 0.0455 |        | 8E-08  | 5153 |
| rs1747 | 10 | 710945 | C | -      | 0.0101 | 3.02E- | 908. |
| 6364   |    | 04     |   | 0.3044 |        | 199    | 336  |
| rs1753 | 19 | 172578 | C | 0.045  | 0.0065 | 6.0186 | 47.9 |
| 3945   |    | 02     |   |        |        | 6E-12  | 2899 |
| rs1879 | 3  | 170727 | A | -      | 0.0071 | 1.4288 | 45.5 |
| 442    |    | 351    |   | 0.0479 |        | 9E-11  | 1498 |
| rs2748 | 17 | 761218 | G | 0.0849 | 0.0076 | 9.1579 | 124. |
| 427    |    | 64     |   |        |        | 9E-29  | 7924 |
| rs2908 | 7  | 442239 | A | 0.1141 | 0.0083 | 6.7158 | 188. |
| 289    |    | 42     |   |        |        | 3E-43  | 9797 |
| rs2968 | 16 | 888586 | G | 0.058  | 0.0064 | 2.1938 | 82.1 |
| 478    |    | 46     |   |        |        | 1E-19  | 2891 |
| rs3818 | 17 | 177071 | C | -      | 0.0064 | 1.8399 | 54.3 |



|        |    |        |   |        |        |        |      |
|--------|----|--------|---|--------|--------|--------|------|
| 717    |    | 05     |   | 0.0472 |        | 2E-13  | 9063 |
| rs3935 | 9  | 139238 | G | 0.0548 | 0.0073 | 4.3052 | 56.3 |
| 875    |    | 824    |   |        |        | 7E-14  | 5279 |
| rs4300 | 8  | 118217 | A | -      | 0.0068 | 8.3926 | 65.1 |
| 038    |    | 915    |   | 0.0549 |        | 7E-16  | 8188 |
| rs4340 | 4  | 144938 | G | -      | 0.0066 | 3.1746 | 95.2 |
| 756    |    | 216    |   | 0.0644 |        | 8E-22  | 1028 |
| rs4737 | 8  | 416304 | A | 0.0735 | 0.0076 | 3.5917 | 93.5 |
| 010    |    | 47     |   |        |        | E-22   | 2926 |
| rs5608 | 2  | 169763 | C | 0.1156 | 0.0068 | 1.4849 | 289  |
| 87     |    | 148    |   |        |        | 1E-64  |      |
| rs6602 | 13 | 114551 | C | 0.0492 | 0.0066 | 1.2080 | 55.5 |
| 909    |    | 993    |   |        |        | 9E-13  | 7025 |
| rs7632 | 7  | 441859 | G | 0.0574 | 0.0098 | 4.4100 | 34.3 |
| 3047   |    | 55     |   |        |        | 1E-09  | 0612 |
| rs7903 | 10 | 114758 | T | 0.0655 | 0.0074 | 5.7956 | 78.3 |
| 146    |    | 349    |   |        |        | 2E-19  | 4642 |
| rs7922 | 6  | 260984 | C | -      | 0.0112 | 1.9050 | 145. |
| 0007   |    | 74     |   | 0.1353 |        | 2E-33  | 935  |
| rs8557 | 22 | 374629 | G | -      | 0.0064 | 9.4080 | 73.5 |
| 91     |    | 36     |   | 0.0549 |        | 6E-18  | 8423 |
| rs9376 | 6  | 135411 | C | -      | 0.0072 | 1.0639 | 59.2 |



|        |    |        |   |        |        |        |        |      |
|--------|----|--------|---|--------|--------|--------|--------|------|
| 090    |    | 228    |   |        | 0.0554 |        | E-14   | 0448 |
| rs9410 | 9  | 914277 | G |        | -      | 0.0131 | 2.4541 | 72.0 |
| 357    |    | 77     |   |        | 0.1112 |        | 4E-17  | 5547 |
| rs9826 | 3  | 122942 | G |        | -      | 0.0063 | 2.2550 | 40.7 |
| 367    |    | 02     |   |        | 0.0402 |        | 2E-10  | 1655 |
| rs1160 | 6  | 328498 | T | 0.0498 | -      | 0.0514 | 4.917E | 102. |
| 39340  |    | 21     |   | 4      | 0.5196 |        | -24    | 1909 |
| rs1611 | 6  | 297486 | A | 0.2234 | -      | 0.0258 | 1.6951 | 49.9 |
| 236    |    | 90     |   |        | 0.1823 |        | 2E-12  | 2682 |
| rs1836 | 6  | 308469 | T | 0.0166 | -      | 0.0918 | 5.8762 | 47.3 |
| 97542  |    | 41     |   | 8      | 0.6317 |        | 5E-12  | 5179 |
| rs3129 | 6  | 324063 | C | 0.6448 | 0.7752 | 0.023  | 1E-200 | 1135 |
| 871    |    | 42     |   |        |        |        |        | .983 |
| rs3184 | 12 | 111884 | C | 0.5907 | -      | 0.0212 | 8.9701 | 60.2 |
| 504    |    | 608    |   |        | 0.1646 |        | 6E-15  | 8204 |
| rs3433 | 14 | 101307 | A | 0.4153 | -      | 0.0213 | 3.5109 | 30.3 |
| 7125   |    | 703    |   |        | 0.1173 |        | 9E-08  | 2751 |
| rs4117 | 22 | 304248 | G | 0.6835 | -      | 0.0223 | 1.309E | 36.8 |
| 3      |    | 63     |   |        | 0.1354 |        | -09    | 6613 |
| rs6679 | 1  | 114303 | A | 0.1473 | 0.4475 | 0.0295 | 8.2375 | 230. |
| 677    |    | 808    |   |        |        |        | 9E-52  | 1135 |
| rs689  | 11 | 218222 | T | 0.792  | 0.399  | 0.0274 | 5.2905 | 212. |



|        |    |        |   |        |        |        |        |      |
|--------|----|--------|---|--------|--------|--------|--------|------|
|        |    | 4      |   |        |        |        | 4E-48  | 0531 |
| rs7056 | 12 | 563848 | A | 0.3857 | 0.1409 | 0.0215 | 5.2444 | 42.9 |
| 99     |    | 04     |   |        |        |        | 5E-11  | 4821 |
| rs7420 | 21 | 457142 | T | 0.0372 | 0.3587 | 0.0549 | 6.6343 | 42.6 |
| 3920   |    | 94     |   | 6      |        |        | 7E-11  | 892  |
| rs9275 | 6  | 326545 | G | 0.2187 | 0.9606 | 0.0256 | 1E-200 | 1408 |
| 183    |    | 02     |   |        |        |        |        | .008 |
| rs9468 | 6  | 297507 | T | 0.0559 | -      | 0.0483 | 5.5513 | 52.0 |
| 618    |    | 76     |   | 7      | 0.3484 |        | 7E-13  | 3098 |

164 **Supplementary Table 3. Genetic variants that were used as instruments for vitiligo**

| SNP      | C  | Pos    | Effe | Effect  | Beta     | SE       | P    | F      |
|----------|----|--------|------|---------|----------|----------|------|--------|
|          | hr |        | ct   | Allele  |          |          | valu |        |
|          |    |        | Alle | Freque  |          |          | e    |        |
|          |    |        | le   | ncy     |          |          |      |        |
| rs108184 | 9  | 123634 | G    | 0.01824 | 0.000860 | 0.000154 | 2.67 | 30.935 |
| 77       |    | 029    |      | 44      | 426      | 697      | E-08 | 936    |
| rs113405 | 7  | 644931 | T    | 0.00325 | 0.002188 | 0.000383 | 1.15 | 32.577 |
| 464      |    |        |      | 031     | 17       | 374      | E-08 | 429    |
| rs114423 | 2  | 457693 | A    | 0.00328 | 0.002186 | 0.000380 | 9.11 | 33.023 |
| 859      |    | 59     |      | 441     | 11       | 416      | E-09 | 756    |
| rs115241 | 2  | 203383 | C    | 0.00856 | 0.001424 | 0.000228 | 4.91 | 38.716 |
| 301      |    | 263    |      | 171     | 19       | 886      | E-10 | 617    |

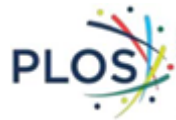

|          |    |        |   |         |          |          |      |        |
|----------|----|--------|---|---------|----------|----------|------|--------|
| rs117217 | 20 | 142924 | G | 0.01397 | 0.001036 | 0.000179 | 7.35 | 33.441 |
| 780      |    | 67     |   | 25      | 9        | 305      | E-09 | 746    |
| rs117918 | 15 | 550961 | C | 0.00983 | 0.001390 | 0.000209 | 3.33 | 43.974 |
| 443      |    | 57     |   | 544     | 76       | 726      | E-11 | 391    |
| rs132701 | 8  | 413325 | G | 0.01730 | 0.001112 | 0.000160 | 4.22 | 48.024 |
| 91       |    | 11     |   | 73      | 81       | 579      | E-12 | 687    |
| rs138415 | 2  | 134190 | T | 0.02434 | 0.000769 | 0.000138 | 2.83 | 30.818 |
| 604      |    | 944    |   | 47      | 211      | 56       | E-08 | 764    |
| rs140098 | 1  | 447721 | A | 0.00902 | 0.001236 | 0.000221 | 2.42 | 31.129 |
| 080      |    | 00     |   | 138     | 13       | 553      | E-08 | 563    |
| rs141164 | 9  | 875216 | A | 0.00774 | 0.001552 | 0.000244 | 2.23 | 40.252 |
| 669      |    | 26     |   | 024     | 91       | 765      | E-10 | 6      |
| rs144017 | 9  | 898405 | T | 0.00975 | 0.001312 | 0.000212 | 6.92 | 38.044 |
| 585      |    | 75     |   | 537     | 13       | 73       | E-10 | 883    |
| rs145651 | 8  | 135649 | A | 0.00318 | 0.002205 | 0.000378 | 5.84 | 33.887 |
| 908      |    | 198    |   | 803     | 27       | 826      | E-09 | 847    |
| rs147122 | 5  | 234518 | G | 0.01637 | 0.000937 | 0.000167 | 2.27 | 31.253 |
| 750      |    | 05     |   | 76      | 204      | 643      | E-08 | 411    |
| rs147843 | 10 | 943823 | A | 0.02850 | 0.000686 | 0.000125 | 3.92 | 30.190 |
| 757      |    | 59     |   | 25      | 841      | 004      | E-08 | 104    |
| rs148393 | 10 | 143321 | A | 0.02631 | 0.000751 | 0.000130 | 8.43 | 33.175 |





|          |    |        |   |         |          |          |      |        |
|----------|----|--------|---|---------|----------|----------|------|--------|
| 137      |    | 99     |   | 68      | 015      | 389      | E-09 | 335    |
| rs149961 | 19 | 542695 | C | 0.00608 | 0.001581 | 0.000279 | 1.52 | 32.028 |
| 991      |    | 12     |   | 543     | 49       | 446      | E-08 | 537    |
| rs151035 | 2  | 161261 | A | 0.00711 | 0.001438 | 0.000249 | 8.48 | 33.164 |
| 772      |    | 546    |   | 746     | 69       | 822      | E-09 | 472    |
| rs169420 | 18 | 235833 | G | 0.00454 | 0.001684 | 0.000304 | 3.14 | 30.621 |
| 56       |    | 15     |   | 183     | 31       | 376      | E-08 | 273    |
| rs181638 | 4  | 404169 | A | 0.00606 | 0.001486 | 0.000272 | 4.71 | 29.835 |
| 428      |    | 41     |   | 912     | 13       | 076      | E-08 | 487    |
| rs482381 | 22 | 468350 | C | 0.00100 | 0.004158 | 0.000645 | 1.19 | 41.483 |
| 0        |    | 00     |   | 089     | 63       | 674      | E-10 | 364    |
| rs765297 | 9  | 757277 | G | 0.00709 | 0.001607 | 0.000243 | 4.29 | 43.480 |
| 09       |    | 48     |   | 225     | 31       | 754      | E-11 | 626    |
| rs108184 | 9  | 123634 | G | 0.01824 | 0.000860 | 0.000154 | 2.67 | 30.935 |
| 77       |    | 029    |   | 44      | 426      | 697      | E-08 | 936    |
| rs113405 | 7  | 644931 | T | 0.00325 | 0.002188 | 0.000383 | 1.15 | 32.577 |
| 464      |    |        |   | 031     | 17       | 374      | E-08 | 429    |
| rs114423 | 2  | 457693 | A | 0.00328 | 0.002186 | 0.000380 | 9.11 | 33.023 |
| 859      |    | 59     |   | 441     | 11       | 416      | E-09 | 756    |
| rs115241 | 2  | 203383 | C | 0.00856 | 0.001424 | 0.000228 | 4.91 | 38.716 |
| 301      |    | 263    |   | 171     | 19       | 886      | E-10 | 617    |



|          |    |        |   |         |          |          |      |        |
|----------|----|--------|---|---------|----------|----------|------|--------|
| rs117217 | 20 | 142924 | G | 0.01397 | 0.001036 | 0.000179 | 7.35 | 33.441 |
| 780      |    | 67     |   | 25      | 9        | 305      | E-09 | 746    |
| rs117918 | 15 | 550961 | C | 0.00983 | 0.001390 | 0.000209 | 3.33 | 43.974 |
| 443      |    | 57     |   | 544     | 76       | 726      | E-11 | 391    |
| rs132701 | 8  | 413325 | G | 0.01730 | 0.001112 | 0.000160 | 4.22 | 48.024 |
| 91       |    | 11     |   | 73      | 81       | 579      | E-12 | 687    |
| rs138415 | 2  | 134190 | T | 0.02434 | 0.000769 | 0.000138 | 2.83 | 30.818 |
| 604      |    | 944    |   | 47      | 211      | 56       | E-08 | 764    |
| rs140098 | 1  | 447721 | A | 0.00902 | 0.001236 | 0.000221 | 2.42 | 31.129 |
| 080      |    | 00     |   | 138     | 13       | 553      | E-08 | 563    |
| rs141164 | 9  | 875216 | A | 0.00774 | 0.001552 | 0.000244 | 2.23 | 40.252 |
| 669      |    | 26     |   | 024     | 91       | 765      | E-10 | 6      |
| rs144017 | 9  | 898405 | T | 0.00975 | 0.001312 | 0.000212 | 6.92 | 38.044 |
| 585      |    | 75     |   | 537     | 13       | 73       | E-10 | 883    |
| rs147122 | 5  | 234518 | G | 0.01637 | 0.000937 | 0.000167 | 2.27 | 31.253 |
| 750      |    | 05     |   | 76      | 204      | 643      | E-08 | 411    |
| rs147843 | 10 | 943823 | A | 0.02850 | 0.000686 | 0.000125 | 3.92 | 30.190 |
| 757      |    | 59     |   | 25      | 841      | 004      | E-08 | 104    |
| rs148393 | 10 | 143321 | A | 0.02631 | 0.000751 | 0.000130 | 8.43 | 33.175 |
| 137      |    | 99     |   | 68      | 015      | 389      | E-09 | 335    |
| rs149961 | 19 | 542695 | C | 0.00608 | 0.001581 | 0.000279 | 1.52 | 32.028 |



|          |    |        |   |         |          |          |      |        |
|----------|----|--------|---|---------|----------|----------|------|--------|
| 991      |    | 12     |   | 543     | 49       | 446      | E-08 | 537    |
| rs151035 | 2  | 161261 | A | 0.00711 | 0.001438 | 0.000249 | 8.48 | 33.164 |
| 772      |    | 546    |   | 746     | 69       | 822      | E-09 | 472    |
| rs169420 | 18 | 235833 | G | 0.00454 | 0.001684 | 0.000304 | 3.14 | 30.621 |
| 56       |    | 15     |   | 183     | 31       | 376      | E-08 | 273    |
| rs181638 | 4  | 404169 | A | 0.00606 | 0.001486 | 0.000272 | 4.71 | 29.835 |
| 428      |    | 41     |   | 912     | 13       | 076      | E-08 | 487    |
| rs482381 | 22 | 468350 | C | 0.00100 | 0.004158 | 0.000645 | 1.19 | 41.483 |
| 0        |    | 00     |   | 089     | 63       | 674      | E-10 | 364    |
| rs765297 | 9  | 757277 | G | 0.00709 | 0.001607 | 0.000243 | 4.29 | 43.480 |
| 09       |    | 48     |   | 225     | 31       | 754      | E-11 | 626    |
| rs108184 | 9  | 123634 | G | 0.01824 | 0.000860 | 0.000154 | 2.67 | 30.935 |
| 77       |    | 029    |   | 44      | 426      | 697      | E-08 | 936    |
| rs113405 | 7  | 644931 | T | 0.00325 | 0.002188 | 0.000383 | 1.15 | 32.577 |
| 464      |    |        |   | 031     | 17       | 374      | E-08 | 429    |
| rs114423 | 2  | 457693 | A | 0.00328 | 0.002186 | 0.000380 | 9.11 | 33.023 |
| 859      |    | 59     |   | 441     | 11       | 416      | E-09 | 756    |
| rs115241 | 2  | 203383 | C | 0.00856 | 0.001424 | 0.000228 | 4.91 | 38.716 |
| 301      |    | 263    |   | 171     | 19       | 886      | E-10 | 617    |
| rs117217 | 20 | 142924 | G | 0.01397 | 0.001036 | 0.000179 | 7.35 | 33.441 |
| 780      |    | 67     |   | 25      | 9        | 305      | E-09 | 746    |



|                 |    |               |   |                |                 |                 |              |               |
|-----------------|----|---------------|---|----------------|-----------------|-----------------|--------------|---------------|
| rs117918<br>443 | 15 | 550961<br>57  | C | 0.00983<br>544 | 0.001390<br>76  | 0.000209<br>726 | 3.33<br>E-11 | 43.974<br>391 |
| rs132701<br>91  | 8  | 413325<br>11  | G | 0.01730<br>73  | 0.001112<br>81  | 0.000160<br>579 | 4.22<br>E-12 | 48.024<br>687 |
| rs138415<br>604 | 2  | 134190<br>944 | T | 0.02434<br>47  | 0.000769<br>211 | 0.000138<br>56  | 2.83<br>E-08 | 30.818<br>764 |
| rs140098<br>080 | 1  | 447721<br>00  | A | 0.00902<br>138 | 0.001236<br>13  | 0.000221<br>553 | 2.42<br>E-08 | 31.129<br>563 |
| rs141164<br>669 | 9  | 875216<br>26  | A | 0.00774<br>024 | 0.001552<br>91  | 0.000244<br>765 | 2.23<br>E-10 | 40.252<br>6   |
| rs144017<br>585 | 9  | 898405<br>75  | T | 0.00975<br>537 | 0.001312<br>13  | 0.000212<br>73  | 6.92<br>E-10 | 38.044<br>883 |
| rs147122<br>750 | 5  | 234518<br>05  | G | 0.01637<br>76  | 0.000937<br>204 | 0.000167<br>643 | 2.27<br>E-08 | 31.253<br>411 |
| rs147843<br>757 | 10 | 943823<br>59  | A | 0.02850<br>25  | 0.000686<br>841 | 0.000125<br>004 | 3.92<br>E-08 | 30.190<br>104 |
| rs148393<br>137 | 10 | 143321<br>99  | A | 0.02631<br>68  | 0.000751<br>015 | 0.000130<br>389 | 8.43<br>E-09 | 33.175<br>335 |
| rs149961<br>991 | 19 | 542695<br>12  | C | 0.00608<br>543 | 0.001581<br>49  | 0.000279<br>446 | 1.52<br>E-08 | 32.028<br>537 |
| rs151035        | 2  | 161261        | A | 0.00711        | 0.001438        | 0.000249        | 8.48         | 33.164        |



|          |    |        |   |         |          |          |      |        |
|----------|----|--------|---|---------|----------|----------|------|--------|
| 772      |    | 546    |   | 746     | 69       | 822      | E-09 | 472    |
| rs169420 | 18 | 235833 | G | 0.00454 | 0.001684 | 0.000304 | 3.14 | 30.621 |
| 56       |    | 15     |   | 183     | 31       | 376      | E-08 | 273    |
| rs181638 | 4  | 404169 | A | 0.00606 | 0.001486 | 0.000272 | 4.71 | 29.835 |
| 428      |    | 41     |   | 912     | 13       | 076      | E-08 | 487    |
| rs482381 | 22 | 468350 | C | 0.00100 | 0.004158 | 0.000645 | 1.19 | 41.483 |
| 0        |    | 00     |   | 089     | 63       | 674      | E-10 | 364    |
| rs765297 | 9  | 757277 | G | 0.00709 | 0.001607 | 0.000243 | 4.29 | 43.480 |
| 09       |    | 48     |   | 225     | 31       | 754      | E-11 | 626    |
| rs108184 | 9  | 123634 | G | 0.01824 | 0.000860 | 0.000154 | 2.67 | 30.935 |
| 77       |    | 029    |   | 44      | 426      | 697      | E-08 | 936    |
| rs117217 | 20 | 142924 | G | 0.01397 | 0.001036 | 0.000179 | 7.35 | 33.441 |
| 780      |    | 67     |   | 25      | 9        | 305      | E-09 | 746    |
| rs132701 | 8  | 413325 | G | 0.01730 | 0.001112 | 0.000160 | 4.22 | 48.024 |
| 91       |    | 11     |   | 73      | 81       | 579      | E-12 | 687    |
| rs138415 | 2  | 134190 | T | 0.02434 | 0.000769 | 0.000138 | 2.83 | 30.818 |
| 604      |    | 944    |   | 47      | 211      | 56       | E-08 | 764    |
| rs147122 | 5  | 234518 | G | 0.01637 | 0.000937 | 0.000167 | 2.27 | 31.253 |
| 750      |    | 05     |   | 76      | 204      | 643      | E-08 | 411    |
| rs147843 | 10 | 943823 | A | 0.02850 | 0.000686 | 0.000125 | 3.92 | 30.190 |
| 757      |    | 59     |   | 25      | 841      | 004      | E-08 | 104    |



|          |    |        |   |         |          |          |      |        |
|----------|----|--------|---|---------|----------|----------|------|--------|
| rs148393 | 10 | 143321 | A | 0.02631 | 0.000751 | 0.000130 | 8.43 | 33.175 |
| 137      |    | 99     |   | 68      | 015      | 389      | E-09 | 335    |

165

## 166 **Univariate MR Analysis**

167 **Glycemic traits (fasting blood glucose; Hba1c), diabetes traits (T1DM; T2DM)**  
 168 **and vitiligo. IVW method was used as the main test method, and the results**  
 169 **showed as S3Table; Cochran's Q(18) was used as the heterogeneity test, and the**  
 170 **results showed that the Qpval value was < 0.05, suggesting that there was no**  
 171 **heterogeneity. Therefore, we used the fixed effects model IVW approach for the**  
 172 **study. The specific results are shown in S4 table. Mendelian randomisation results**  
 173 **of causal effects between blood glucose characteristics ,diabetes mellitus and**  
 174 **vitiligo.The figure show that T1DM has a causal relationship with the onset of**  
 175 **vitiligo (p=0.018; 95%OR:1.000(1.000-1.000)). In sensitivity analysis (MR-**  
 176 **Egger,Weighted Mode,Weighted Median), horizontal diversity was not found**  
 177 **(p=0.018; 95%OR: 1.000-1.000). We performed Leaveone analysis on the results**  
 178 **to evaluate the influence of single SNPs on the outcome, and the results are shown**  
 179 **in S2Fig.**

180 **Supplementary Table 4.Unltivariate mendelian randomisation results of causal**  
 181 **effects between blood glucose characteristics ,diabetes mellitus and vitiligo (p < 5**  
 182 **× 10−8)**

| <b>outcome</b> | <b>exposure</b> | <b>method</b> | <b>nsnp</b> | <b>pval</b> |
|----------------|-----------------|---------------|-------------|-------------|
|----------------|-----------------|---------------|-------------|-------------|

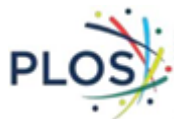

|                 |                        |                                  |           |              |
|-----------------|------------------------|----------------------------------|-----------|--------------|
| <b>vitiligo</b> | <b>T1DM</b>            | <b>Inverse variance weighted</b> | <b>13</b> | <b>0.018</b> |
|                 |                        | <b>MR Egger</b>                  |           | <b>0.625</b> |
|                 |                        | <b>Weighted median</b>           |           | <b>0.543</b> |
|                 |                        | <b>Weighted mode</b>             |           | <b>0.231</b> |
|                 | <b>T2DM</b>            | <b>Inverse variance weighted</b> | <b>56</b> | <b>0.878</b> |
|                 |                        | <b>MR Egger</b>                  |           | <b>0.914</b> |
|                 |                        | <b>Weighted median</b>           |           | <b>0.61</b>  |
|                 |                        | <b>Weighted mode</b>             |           | <b>0.712</b> |
|                 | <b>Fasting glucose</b> | <b>Inverse variance weighted</b> | <b>64</b> | <b>0.247</b> |
|                 |                        | <b>MR Egger</b>                  |           | <b>0.269</b> |
|                 |                        | <b>Weighted median</b>           |           | <b>0.40</b>  |
|                 |                        | <b>Weighted mode</b>             |           | <b>0.326</b> |
|                 | <b>HbA1c</b>           | <b>Inverse variance weighted</b> | <b>26</b> | <b>0.303</b> |
|                 |                        | <b>MR Egger</b>                  |           | <b>0.313</b> |
|                 |                        | <b>Weighted median</b>           |           | <b>0.107</b> |
|                 |                        | <b>Weighted mode</b>             |           | <b>0.18</b>  |

183

S2-S5 Fig. MR leave-one-out sensitivity analysis.

## 184 **Multivariate MR Analysis**

185 **Based on the single-sample MR Analysis, we constructed a multivariate MR**

186 **Model to analyze the causal relationship between Hba1c and T1DM and vitiligo.**

187 **Associations were assessed using the multivariate IVW method as the primary**

188 **analysis method. The results showed that there was still a significant causal**



189 association between T1DM and the onset of vitiligo ( $p=0.016$ , 95% OR=  
 190 1.000(1.000-1.000)), which was consistent with the results of univariate MR  
 191 Analysis(S5Table).Horizontal pleiotropy was tested by MR-PRESSO method, and  
 192 the results were consistent with the IVW results, and there was no horizontal  
 193 pleiotropy.

194 **Supplementary Table 5.Multivariate mendelian randomisation results of causal**  
 195 **effects between Type 1 diabetes, glycated haemoglobin and vitiligo ( $p < 5 \times 10^{-8}$ )**

| Exposure | Outcome  | SNP | pval  | OR    | 95%OR         |
|----------|----------|-----|-------|-------|---------------|
| T1DM     |          |     | 0.016 | 1     | 1.000(1.000   |
|          | Vitiligo | 32  |       |       | to 1.000)     |
| H1bAc    |          |     | 0.235 | 0.999 | 0.999(0.999to |
|          |          |     |       |       | 1.000)        |

196

## 197 Reverse MR Analysis

198 After the univariate MR Analysis demonstrated the causal association of T1DM  
 199 in the pathogenesis of vitiligo, we further explored the causal association between  
 200 vitiligo and blood glucose features and diabetes features. To this end, we  
 201 performed reverse MR Analysis, the specific methods and procedures were  
 202 consistent with univariate MR Analysis. The results of IVW method are shown  
 203 in S10, with vitiligo as exposure, blood glucose features and glycosuria There  
 204 were no significant causal associations between disease characteristics. S3 Fig.  
 205 Reverse MR leave-one-out sensitivity analysis.

206 S6 Table.Reverse mendelian randomisation results of causal effects between  
 207 vitiligo and Type 1 diabetes, Type 2 diabetes, glycated haemoglobin, fasting blood  
 208 glucose ( $p < 5 \times 10^{-8}$ )

| Exposur | NSNPs | Method | OR(95% CI) | P value | Beta | Se |
|---------|-------|--------|------------|---------|------|----|
|---------|-------|--------|------------|---------|------|----|



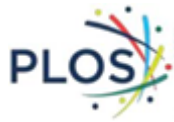

e

|                 |           |            |                                |              |               |               |
|-----------------|-----------|------------|--------------------------------|--------------|---------------|---------------|
| <b>vitiligo</b> | <b>20</b> | <b>IVW</b> | <b>0.033(1.469,745224.259)</b> | <b>0.693</b> | <b>-3.409</b> | <b>8.638</b>  |
|                 | <b>20</b> |            | <b>0(1.346,1.587)</b>          | <b>0.063</b> | <b>-8.831</b> | <b>4.741</b>  |
|                 | <b>21</b> |            | <b>0.092(0.003,2.435)</b>      | <b>0.153</b> | <b>-2.391</b> | <b>1.674</b>  |
|                 | <b>7</b>  |            | <b>0(2.656,31658.427)</b>      | <b>0.354</b> | <b>-9.297</b> | <b>10.031</b> |

209 **Taken together, our results suggest a significant causal association between T1DM**  
 210 **and vitiligo without reverse causality. Other indicators such as blood glucose**  
 211 **indicators; There is no significant causal association between T2DM and vitiligo.**

212 **S6-S9 Fig. Reverse MR leave-one-out sensitivity analysis.**

213

214

215

216

## 217 **Discussion.**

218 **Based on the results of this experiment, we conclude that there is a positive causal**  
 219 **association between diabetes and the occurrence of vitiligo in T1 stage, and there**  
 220 **is no negative causal association between diabetes and blood glucose traits in T2**  
 221 **stage and the occurrence of vitiligo.**

## 222 **Assumptions to explain the outcomes**

223 **The method used in this study is bidirectional MR Analysis(19) combined with**  
 224 **TSMR analysis, which has the advantage of further avoiding the interference of**  
 225 **horizontal pleiotropy and heterogeneity on the study results compared with single**



226 **MR Analysis. Pleiotropy refers to genetic variants as SNPs that may be associated**  
227 **with multiple phenotypes, which can lead to biased causal predictions from MR**  
228 **Analysis.**

229 **A number of studies(20) have shown that diabetes induces different degrees of**  
230 **metabolic problems, and many confounding factors may affect the outcome. Some**  
231 **observational studies(4) have suggested that T1DM and T2DM are closely related**  
232 **to the development of vitiligo. However, in our study, our results do not support**  
233 **an association between T2DM and the onset of vitiligo. Because of the complex**  
234 **pathogenesis of diabetes and its tendency to be complicated by other disease**  
235 **complications, we believe that the association between type T2DM and vitiligo**  
236 **mentioned in observational studies may be related to confounding factors. Two**  
237 **MR Analyses(21, 22) suggested a significant causal association between T2DM and**  
238 **depression, and one meta-analysis(23) concluded that vitiligo induces varying**  
239 **degrees of psychological problems. This finding may be an important reason why**  
240 **vitiligo is associated with T2DM in several observational studies.**

241 **To investigate the relationship between blood glucose and diabetes characteristics**  
242 **and the pathogenesis of vitiligo. Supported by the available data, we conclude that**  
243 **T1DM is causally related to vitiligo and that T1DM does not affect the onset of**  
244 **vitiligo using Hba1c as a mediator.**

245 **Type 1 diabetes mellitus (T1DM)(24) is an autoimmune disease that results in the**  
246 **destruction of insulin-producing pancreatic beta cells. Some studies suggest that**  
247 **T cells and B cells play a crucial role(25) in the pathogenesis of diseases. It has**



248 **been shown(26) that  $\beta$ -cell-targeting autoantibodies targeting insulin or GAD65**  
249 **can be detected in the serum early in the onset of type 1 diabetes. .In addition,**  
250 **CD4+ and CD8+ T cells that are specific for  $\beta$ -cell autoantigens are detectable in**  
251 **patients with stage 3 T1DM and even in patients with earlier stages of the**  
252 **disease(27, 28) . The specific differentiation of T cells may be one of the**  
253 **mechanisms of vitiligo induced by type 1 diabetes. Studies(29) have shown that**  
254 **CD8+ cells play an important role in the pathogenesis of vitiligo. On the one hand,**  
255 **production of the cytokine IFN- $\gamma$  by CD8+ cells is central(29) to disease**  
256 **progression. T cells(30) secrete IFN- $\gamma$  and induce keratinocytes to produce T cell**  
257 **chemokine receptor CXCR3 ligands such as CXCL9 and CXCL10, thereby**  
258 **increasing the number of T cells in the body and promoting the development of**  
259 **vitiligo. On the other hand, the concentration of melanocyte-specific CD8 cells(31)**  
260 **was significantly increased in the early histological examination of vitiligo lesions,**  
261 **and the clones generated by these cells could kill and pigmented cells in vitro(32).**  
262 **We therefore suggest that the proliferation of CD8T cells induced by T1DM may**  
263 **be a mediator of the effect of T1DM on the pathogenesis of vitiligo. We will explore**  
264 **this issue in a follow-up study.**  
265 **Our findings are consistent with those of some controlled experiments(33). We**  
266 **provide theoretical support for this conclusion from the perspective of MR**  
267 **Analysis.**

## 268 **Limitation analysis**

269 **The main potential limitations of this study are:**



270 **1. The analyzed population was limited to European populations, and since race**  
271 **may have influenced our results, we may need to conduct the same MR Study**  
272 **in other races for validation.**

273 **A controlled study(34) with 142 samples suggested an association between insulin**  
274 **resistance and vitiligo. We did not include data on insulin resistance in our GWAS**  
275 **database because the data were current for 2010 and the sample size was not large**  
276 **enough to support the MR Analysis. Since insulin resistance is one of the major**  
277 **clinical manifestations of type 2 diabetes, we believe that this may have had some**  
278 **influence on our study. Further studies on this trait will be conducted after the**  
279 **GWAS database updates the relevant data.**

## 280 **Conclusion.**

281 **The results of MR Studies have shown that T1DM is a potential risk factor for the**  
282 **development of vitiligo, and Mendelian randomization (MR) results have provided**  
283 **genetic evidence for a causal relationship between T1DM and vitiligo. Clinical use**  
284 **of measures to treat T1DM may be a new idea for the prevention or treatment of**  
285 **vitiligo.**

## 286 **Author Contributions**

287 **Conceptualization, S.H.methodology, software, and investigation, Y.C,S.H.;**  
288 **validation,Y.C; formal analysis, S.H; data curation, Y.C. and S.H.; writing—**  
289 **original draft preparation, S.H; writing—review and editing, S.H., Y.C. and J.C.;**  
290 **visualization, Y.C; supervision, Y.C; project administration, J.G,J.Z.; All authors**  
291 **have read and agreed to the published version of the manuscript.**



## 292 **Funding**

293 **This study was supported by the National Natural Science Foundation of**  
294 **China(grant nos. 82074443), and by the Program of Science and Technology**  
295 **Department of Sichuan Province (2021ZYD0089).**

## 296 **Abbreviations and standard terms used in this study**

297 **MR, Mendelian randomization; T1DM, Type 1 Diabetes Mellitus; T2DM, Type 2**  
298 **Diabetes Mellitus; SNPs ,Single-nucleotide polymorphisms; NA, Not available;**  
299 **SE,standard error; OR,Odds ratio; CI, Confidence interval; IV, Instrumental**  
300 **variables; IVW,Inverse variance weighting; MR-PRESSO, Mendelian**  
301 **Randomization Pleiotropy RESidual Sum and Outlier.**

## 302 **Acknowledgments**

303 **Special thanks to the IEU open GWAS project developed by The MRC Integrative**  
304 **Epidemiology Unit (IEU) at the University of Bristol.We want to acknowledge the**  
305 **participants and investigators of the FinnGen study.We would also like to**  
306 **acknowledge the summary statistics provided by the UK Biobank and the**  
307 **European Bioinformatics Institute.**

308 **“†” on behalf of the cofirst author, The order of authorship was discussed and**  
309 **agreed upon by all the authors.**

## 310 **Data Availability Statement**

311 **Publicly available datasets were analyzed in this study. This data can be found**  
312 **here: All GWAS data used in this study are available in the IEU open GWAS**  
313 **project (<https://gwas.mrcieu.ac.uk/>). Detailed data on vitiligo are available in the**



314 **GWAS through the UK Biobank data**(<http://www.nealelab.is/uk-biobank/c>).  
315 **Summary statistics for T1DM and T2DM are from the FinnGen Consortium**  
316 **(<https://r8.finngen.fi>).**

## 317 **References.**

- 318 **1. Alikhan A, Felsten LM, Daly M, Petronic-Rosic V. Vitiligo: a comprehensive**  
319 **overview Part I. Introduction, epidemiology, quality of life, diagnosis, differential**  
320 **diagnosis, associations, histopathology, etiology, and work-up. J Am Acad**  
321 **Dermatol. 2011;65(3):473-91.**
- 322 **2. Afkhami-Ardekani M, Ghadiri-Anari A, Ebrahimzadeh-Ardakani M, Zaji N.**  
323 **Prevalence of vitiligo among type 2 diabetic patients in an Iranian population. Int**  
324 **J Dermatol. 2014;53(8):956-8.**
- 325 **3. Chang HC, Lin MH, Huang YC, Hou TY. The association between vitiligo and**  
326 **diabetes mellitus: A systematic review and meta-analysis. J Am Acad Dermatol.**  
327 **2019;81(6):1442-5.**
- 328 **4. Hosseini E, Mokhtari Z, Salehi Abargouei A, Mishra GD, Amani R. Maternal**  
329 **circulating leptin, tumor necrosis factor-alpha, and interleukine-6 in association**  
330 **with gestational diabetes mellitus: a systematic review and meta-analysis. Gynecol**  
331 **Endocrinol. 2023;39(1):2183049.**
- 332 **5. Burgess S, Thompson SG. Multivariable Mendelian randomization: the use of**  
333 **pleiotropic genetic variants to estimate causal effects. Am J Epidemiol.**  
334 **2015;181(4):251-60.**
- 335 **6. Katan MB. Apolipoprotein E isoforms, serum cholesterol, and cancer. Lancet.**



- 336 1986;1(8479):507-8.
- 337 7. Davey Smith G, Ebrahim S. What can mendelian randomisation tell us about  
338 modifiable behavioural and environmental exposures? *Bmj.* 2005;330(7499):1076-  
339 9
- 340 8. Skrivankova VW, Richmond RC, Woolf BAR, Yarmolinsky J, Davies NM,  
341 Swanson SA, et al. Strengthening the Reporting of Observational Studies in  
342 Epidemiology Using Mendelian Randomization: The STROBE-MR Statement.  
343 *Jama.* 2021;326(16):1614-21.
- 344 9. Gough A, Sitch A, Ferris E, Marshall T. Within-subject variation of HbA1c:  
345 A systematic review and meta-analysis. *PLoS One.* 2023;18(8):e0289085.
- 346 10. Ghosh K, Das K, Ghosh S, Chakraborty S, Jatua SK, Bhattacharya A, et al.  
347 Prevalence of Skin Changes in Diabetes Mellitus and its Correlation with Internal  
348 Diseases: A Single Center Observational Study. *Indian J Dermatol.*  
349 2015;60(5):465-9.
- 350 11. Kordonouri O, Maguire AM, Knip M, Schober E, Lorini R, Holl RW, et al.  
351 Other complications and associated conditions with diabetes in children and  
352 adolescents. *Pediatr Diabetes.* 2009;10 Suppl 12:204-10.
- 353 12. Greenland S. An introduction to instrumental variables for epidemiologists.  
354 *Int J Epidemiol.* 2000;29(4):722-9.
- 355 13. Burgess S, Thompson SG. Avoiding bias from weak instruments in Mendelian  
356 randomization studies. *Int J Epidemiol.* 2011;40(3):755-64.
- 357 14. Burgess S, Thompson SG. Interpreting findings from Mendelian



- 358 randomization using the MR-Egger method. *Eur J Epidemiol.* 2017;32(5):377-89.
- 359 15. Bowden J, Davey Smith G, Haycock PC, Burgess S. Consistent Estimation in  
360 Mendelian Randomization with Some Invalid Instruments Using a Weighted  
361 Median Estimator. *Genet Epidemiol.* 2016;40(4):304-14.
- 362 16. Bowden J, Del Greco MF, Minelli C, Davey Smith G, Sheehan N, Thompson  
363 J. A framework for the investigation of pleiotropy in two-sample summary data  
364 Mendelian randomization. *Stat Med.* 2017;36(11):1783-802.
- 365 17. Nikolakopoulou A, Mavridis D, Salanti G. How to interpret meta-analysis  
366 models: fixed effect and random effects meta-analyses. *Evid Based Ment Health.*  
367 2014;17(2):64.
- 368 18. Verbanck M, Chen CY, Neale B, Do R. Detection of widespread horizontal  
369 pleiotropy in causal relationships inferred from Mendelian randomization  
370 between complex traits and diseases. *Nat Genet.* 2018;50(5):693-8.
- 371 19. Paaby AB, Rockman MV. The many faces of pleiotropy. *Trends Genet.*  
372 2013;29(2):66-73.
- 373 20. Kang P, Zhang WG, Ji ZH, Shao ZJ, Li CY. Association between vitiligo and  
374 relevant components of metabolic syndrome: a systematic review and meta-  
375 analysis. *J Dtsch Dermatol Ges.* 2022;20(5):629-41.
- 376 21. Yuan S, Merino J, Larsson SC. Causal factors underlying diabetes risk  
377 informed by Mendelian randomisation analysis: evidence, opportunities and  
378 challenges. *Diabetologia.* 2023;66(5):800-12.
- 379 22. Possidente C, Fanelli G, Serretti A, Fabbri C. Clinical insights into the cross-





- 380 **link between mood disorders and type 2 diabetes: A review of longitudinal studies**  
381 **and Mendelian randomisation analyses. *Neurosci Biobehav Rev.* 2023;152:105298.**
- 382 **23. Lai YC, Yew YW, Kennedy C, Schwartz RA. Vitiligo and depression: a**  
383 **systematic review and meta-analysis of observational studies. *Br J Dermatol.***  
384 **2017;177(3):708-18.**
- 385 **24. Yue Y, Tang Y, Tang J, Shi J, Zhu T, Huang J, et al. Maternal infection during**  
386 **pregnancy and type 1 diabetes mellitus in offspring: a systematic review and meta-**  
387 **analysis. *Epidemiol Infect.* 2018;146(16):2131-8.**
- 388 **25. Felton JL, Conway H, Bonami RH. B Quiet: Autoantigen-Specific Strategies**  
389 **to Silence Raucous B Lymphocytes and Halt Cross-Talk with T Cells in Type 1**  
390 **Diabetes. *Biomedicines.* 2021;9(1).**
- 391 **26. Krischer JP, Lynch KF, Schatz DA, Ilonen J, Lernmark Å, Hagopian WA, et**  
392 **al. The 6 year incidence of diabetes-associated autoantibodies in genetically at-risk**  
393 **children: the TEDDY study. *Diabetologia.* 2015;58(5):980-7.**
- 394 **27. Oling V, Reijonen H, Simell O, Knip M, Ilonen J. Autoantigen-specific**  
395 **memory CD4+ T cells are prevalent early in progression to Type 1 diabetes. *Cell***  
396 ***Immunol.* 2012;273(2):133-9.**
- 397 **28. Roep BO, Peakman M. Antigen targets of type 1 diabetes autoimmunity. *Cold***  
398 ***Spring Harb Perspect Med.* 2012;2(4):a007781.**
- 399 **29. Frisoli ML, Essien K, Harris JE. Vitiligo: Mechanisms of Pathogenesis and**  
400 **Treatment. *Annu Rev Immunol.* 2020;38:621-48.**
- 401 **30. Rashighi M, Agarwal P, Richmond JM, Harris TH, Dresser K, Su MW, et al.**



402 **CXCL10 is critical for the progression and maintenance of depigmentation in a**  
403 **mouse model of vitiligo. *Sci Transl Med.* 2014;6(223):223ra23.**

404 **31. Richmond JM, Masterjohn E, Chu R, Tedstone J, Youd ME, Harris JE.**  
405 **CXCR3 Depleting Antibodies Prevent and Reverse Vitiligo in Mice. *J Invest***  
406 ***Dermatol.* 2017;137(4):982-5.**

407 **32. Edwards J, Wilmott JS, Madore J, Gide TN, Quek C, Tasker A, et al. CD103(+)**  
408 **Tumor-Resident CD8(+) T Cells Are Associated with Improved Survival in**  
409 **Immunotherapy-Naïve Melanoma Patients and Expand Significantly During**  
410 **Anti-PD-1 Treatment. *Clin Cancer Res.* 2018;24(13):3036-45.**

411 **33. Gould IM, Gray RS, Urbaniak SJ, Elton RA, Duncan LJ. Vitiligo in diabetes**  
412 **mellitus. *Br J Dermatol.* 1985;113(2):153-5.**

413 **34. Ibrahim S, El-Tahlawi S, Mogawer RM, El Ansary M, Esmat S, El-Hawary**  
414 **M. Different vitiligo characteristics as predictors of increased risk of metabolic**  
415 **syndrome and insulin resistance: A case-control study. *J Cosmet Dermatol.***  
416 **2022;21(12):7170-7.**

## 417 **Supporting information.**

418 **S1 Fig. Study design and workflow.**

419 **S2-S5 Fig. MR leave-one-out sensitivity analysis.**

420 **S6-S9 Fig. Reverse MR leave-one-out sensitivity analysis.**

421 **S1 Table.Data Source**

422 **S2 Table.Genetic variants that were used as instruments for diabetes traits and**  
423 **blood sugar traits**

424 **S3 Table.Univariate mendelian randomisation results of causal effects between**  
425 **Type 1 diabetes and vitiligo ( $p < 5 \times 10^{-8}$ )**

426 **S4 Table. Mendelian randomisation results of causal effects between blood**  
427 **glucose characteristics ,diabetes mellitus and vitiligo.**

428 **S5 Table.Multivariate mendelian randomisation results of causal effects between**  
429 **Type 1 diabetes, glycated haemoglobin and vitiligo ( $p < 5 \times 10^{-8}$ )**



430 **S6 Table.Reverse mendelian randomisation results of causal effects between**  
431 **vitiligo and Type 1 diabetes,Type 2 diabetes, glycated haemoglobin, fasting blood**  
432 **glucose ( $p < 5 \times 10^{-8}$ )**

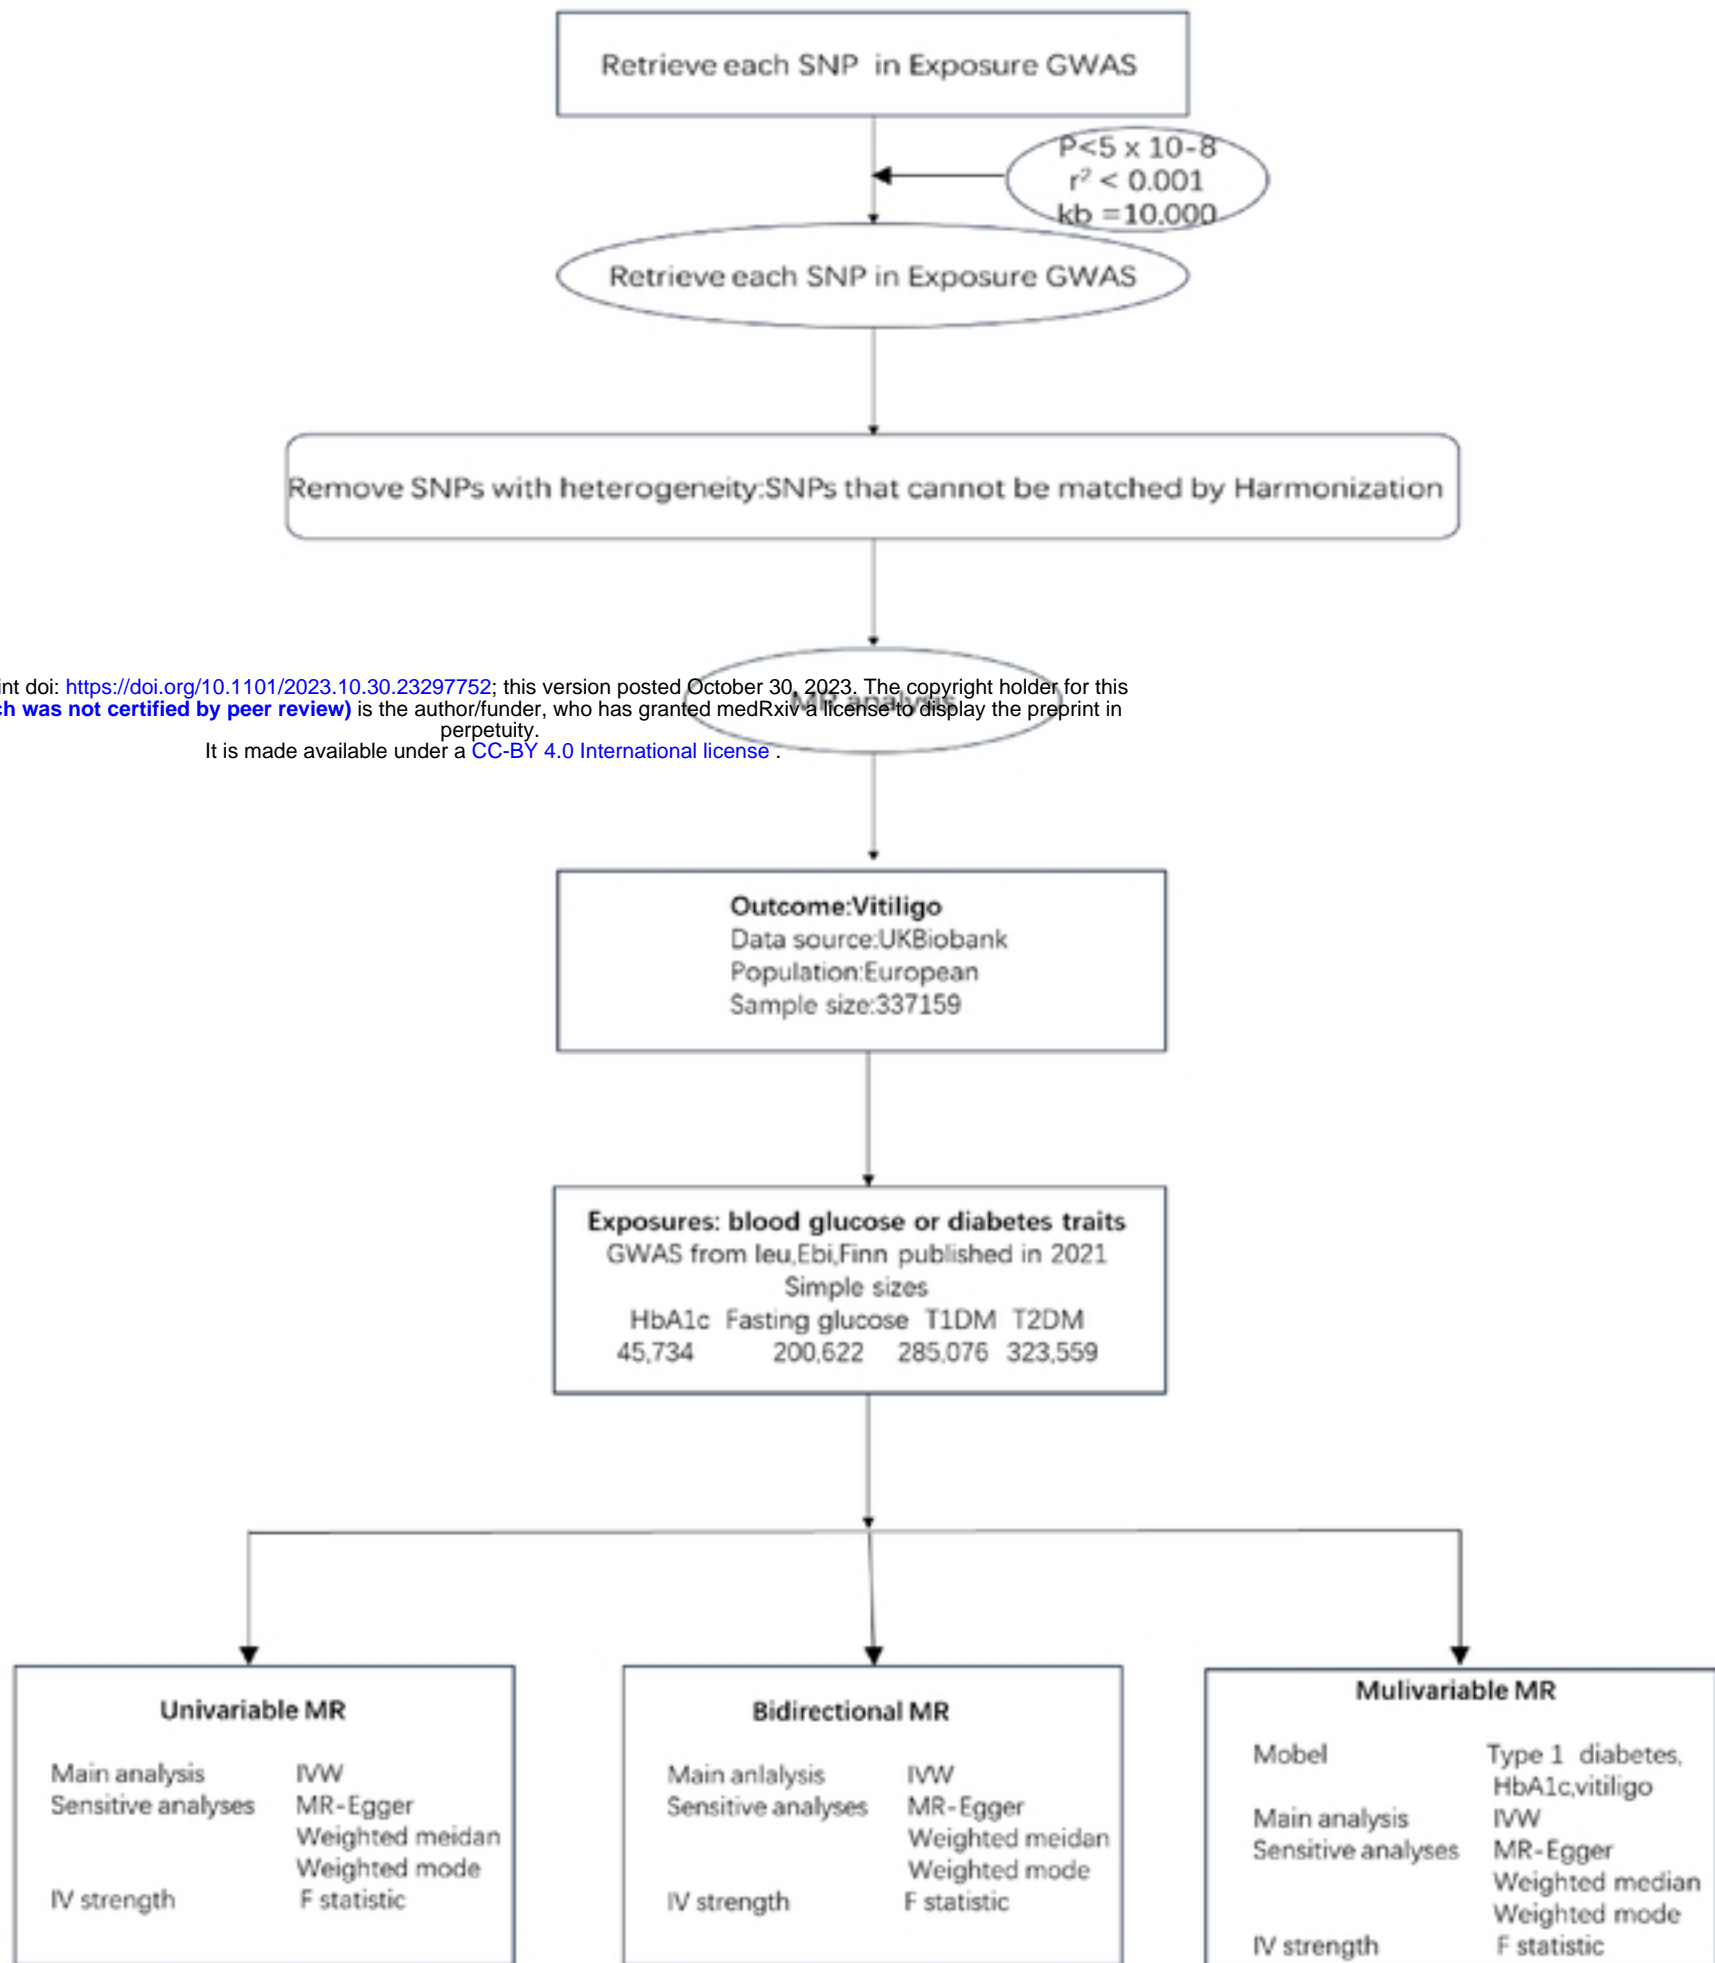

medRxiv preprint doi: <https://doi.org/10.1101/2023.10.30.23297752>; this version posted October 30, 2023. The copyright holder for this preprint (which was not certified by peer review) is the author/funder, who has granted medRxiv a license to display the preprint in perpetuity. It is made available under a [CC-BY 4.0 International license](https://creativecommons.org/licenses/by/4.0/).

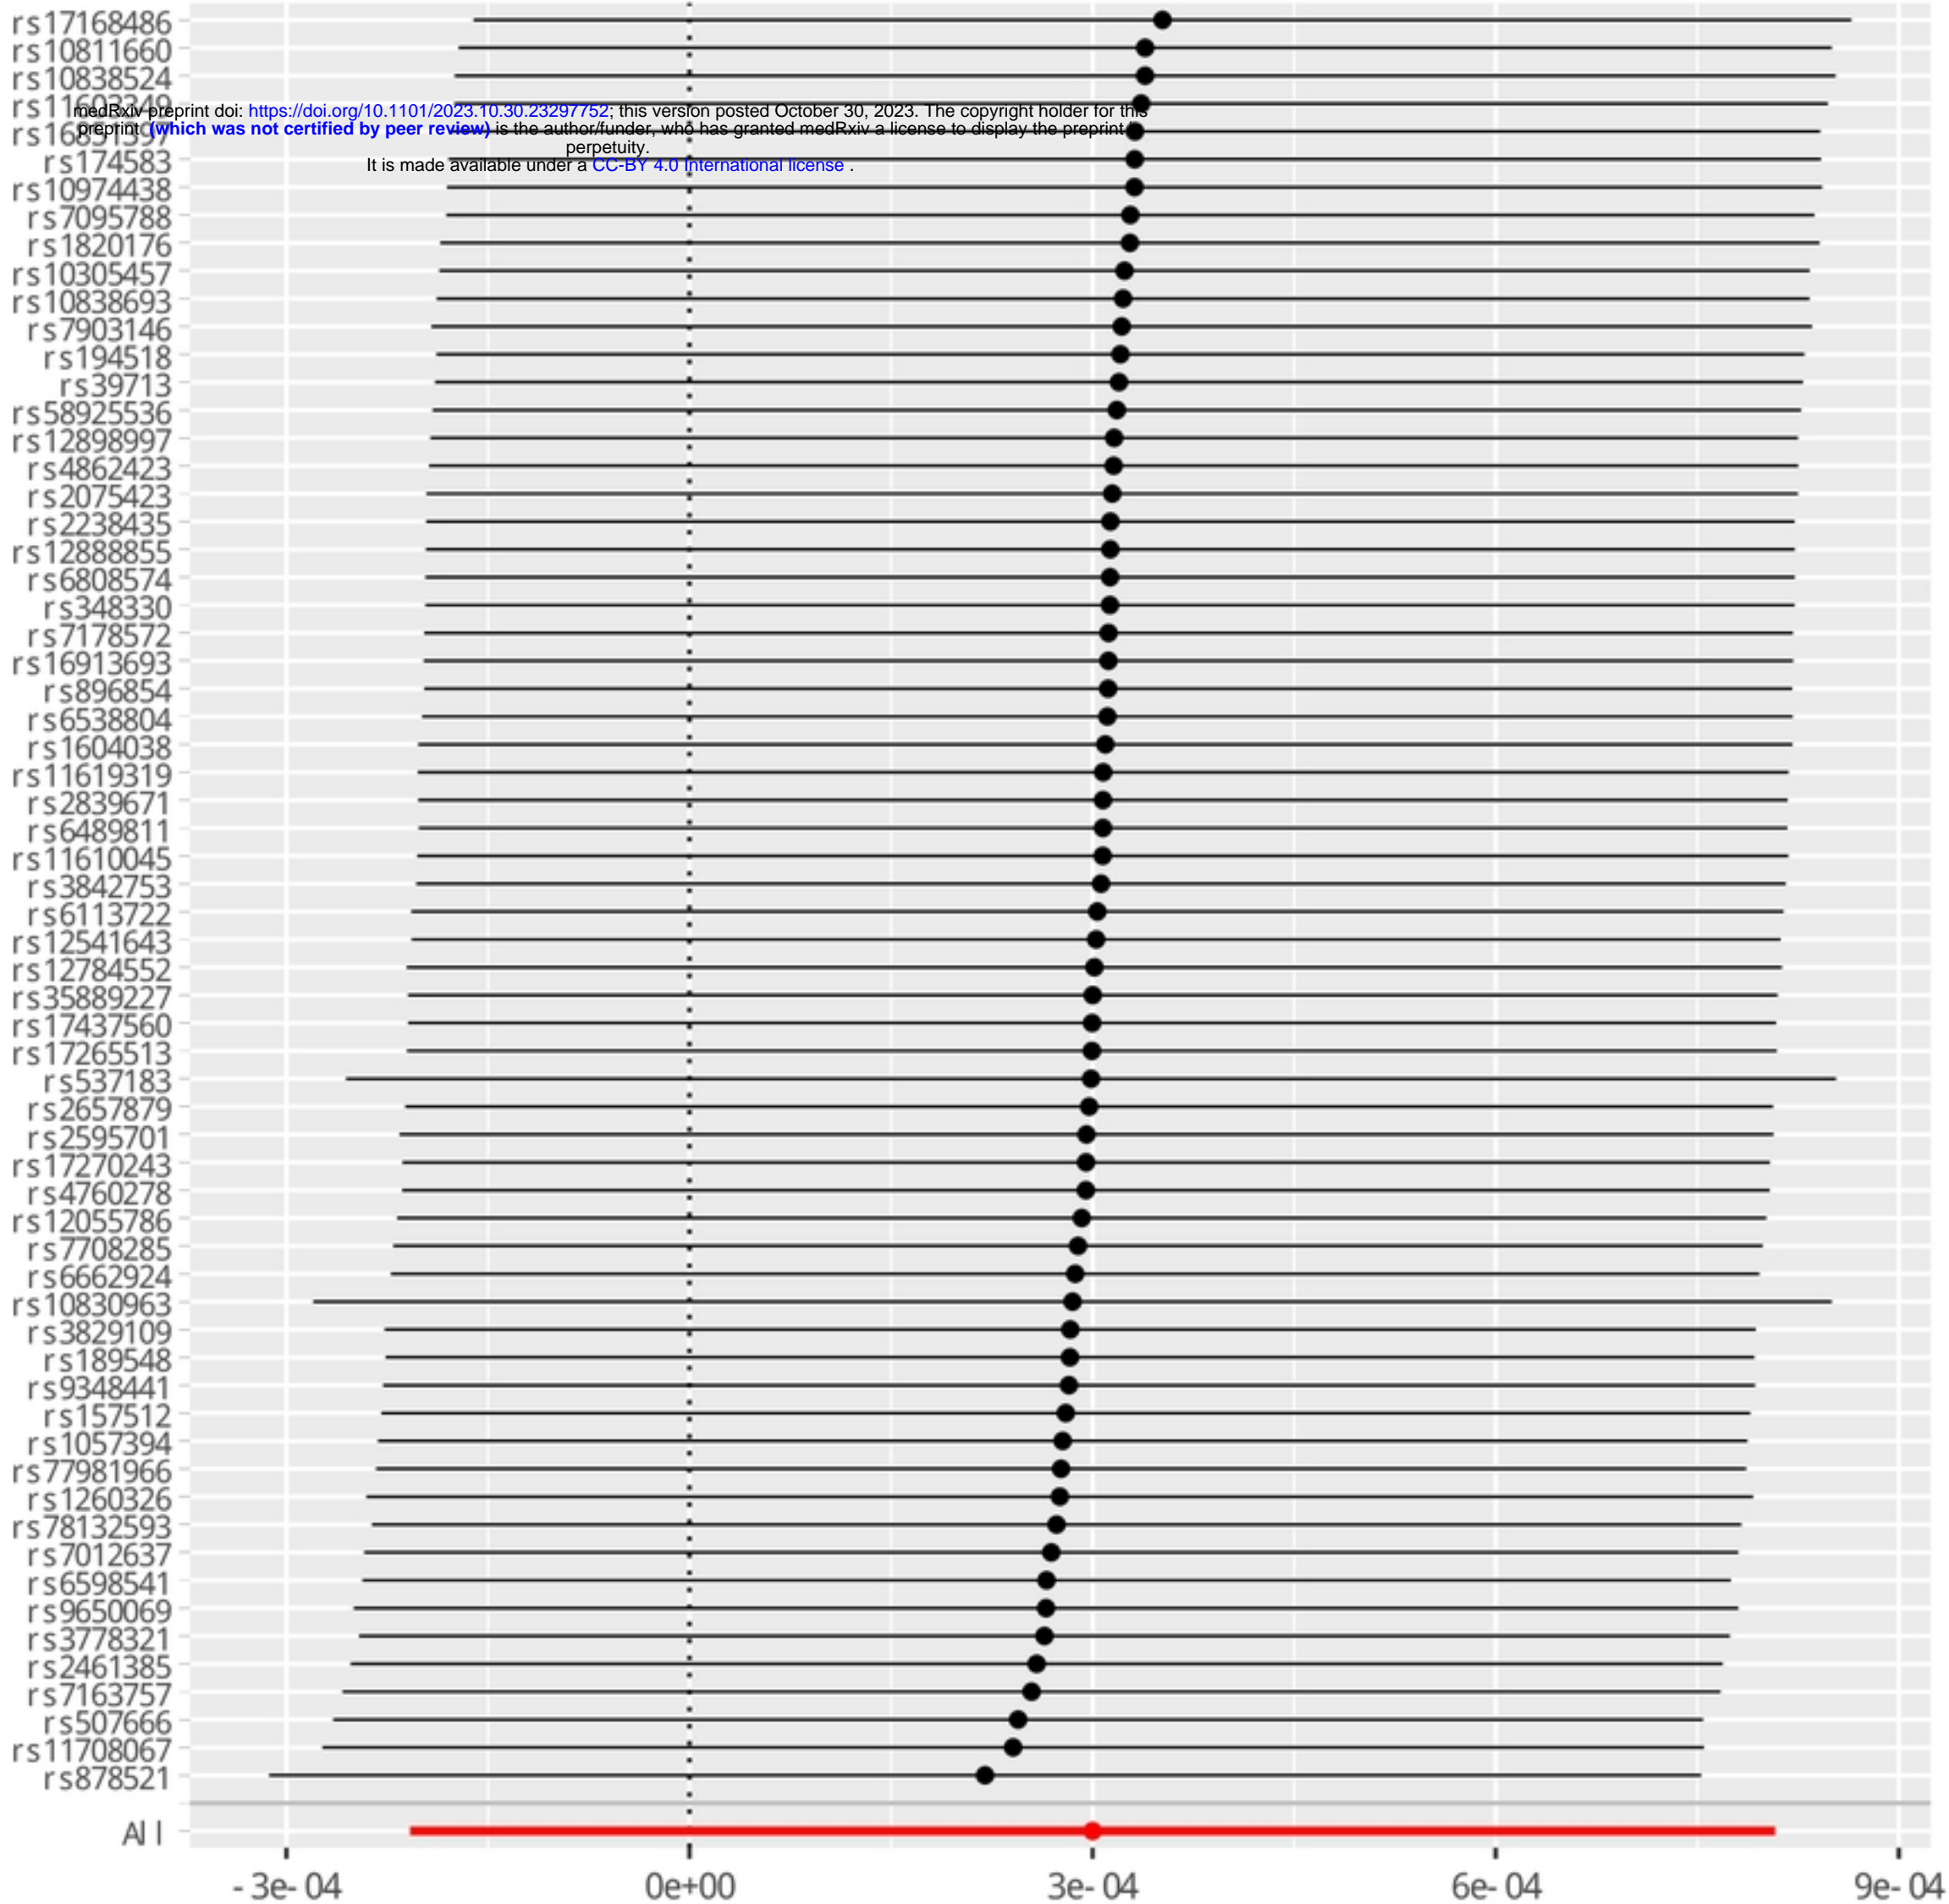

MR leave-one-out sensitivity analysis for 'Fasting glucose || id: ebi-a-GCST90002232' on 'Nbn-cancer illness code self-reported: vitiligo || id: ukb-a-115'

medRxiv preprint doi: <https://doi.org/10.1101/2023.10.30.23297752>; this version posted October 30, 2023. The copyright holder for this preprint (which was not certified by peer review) is the author/funder, who has granted medRxiv a license to display the preprint in perpetuity. It is made available under a [CC-BY 4.0 International license](https://creativecommons.org/licenses/by/4.0/).

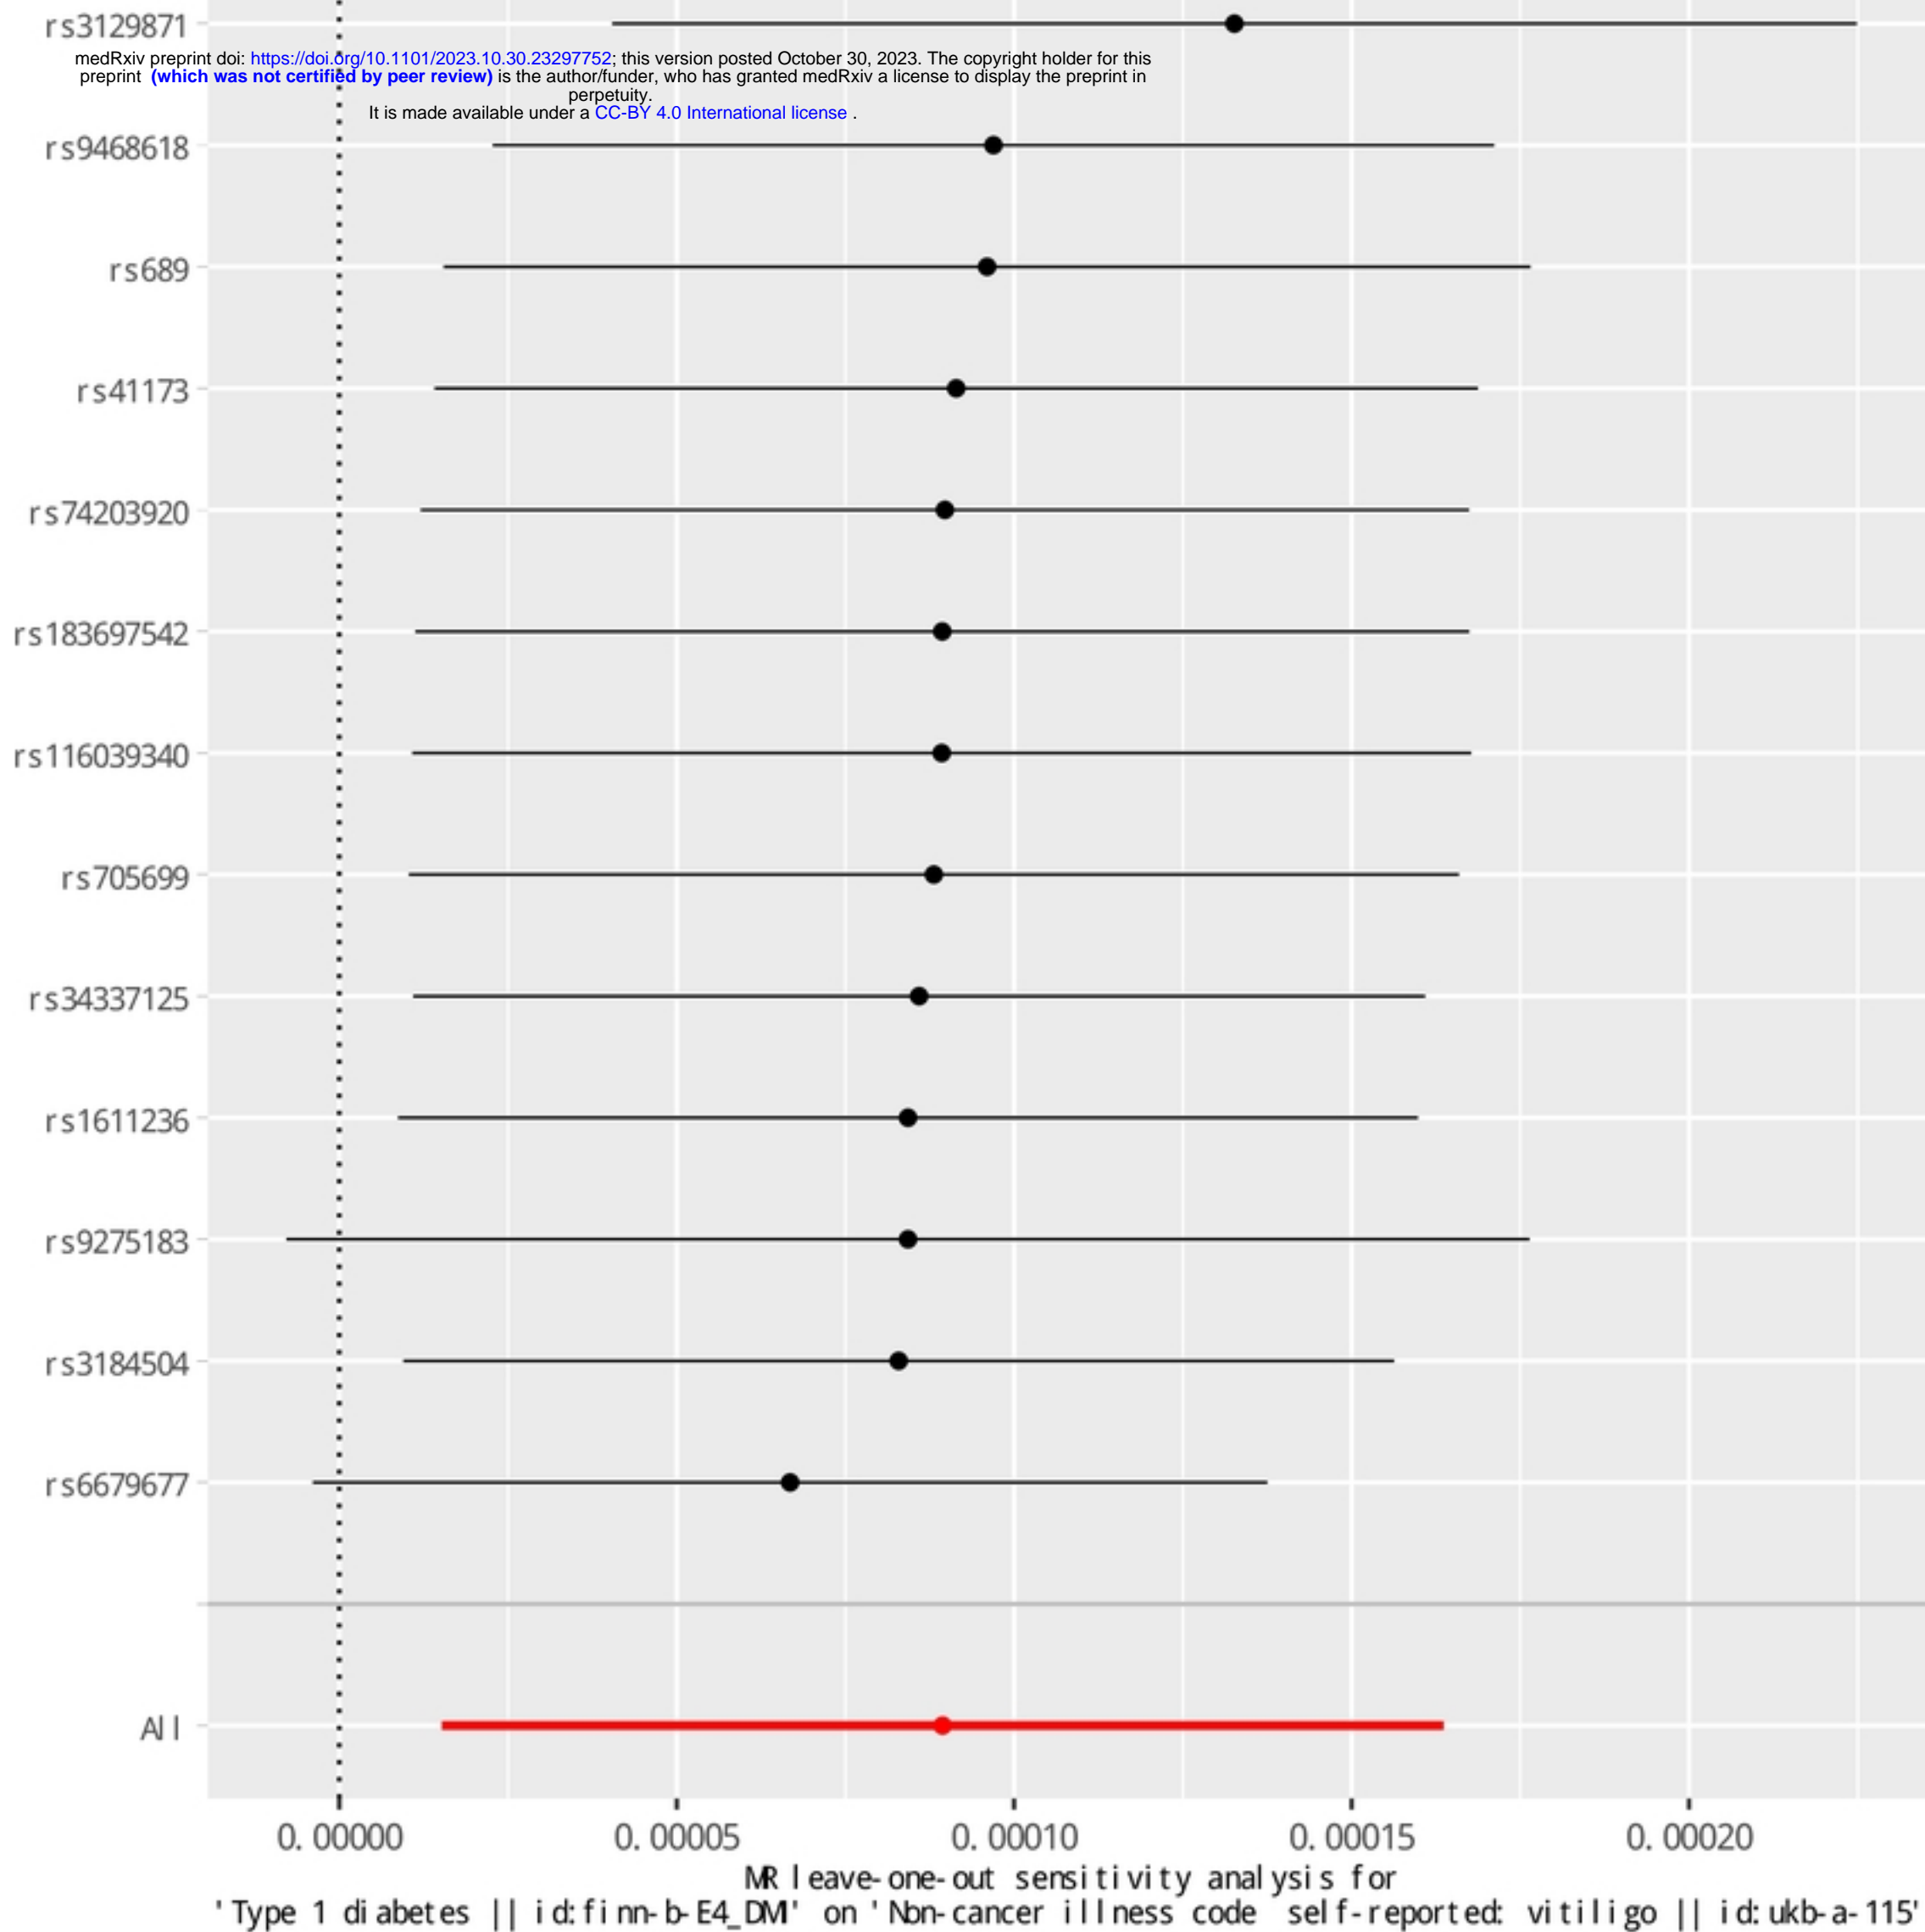

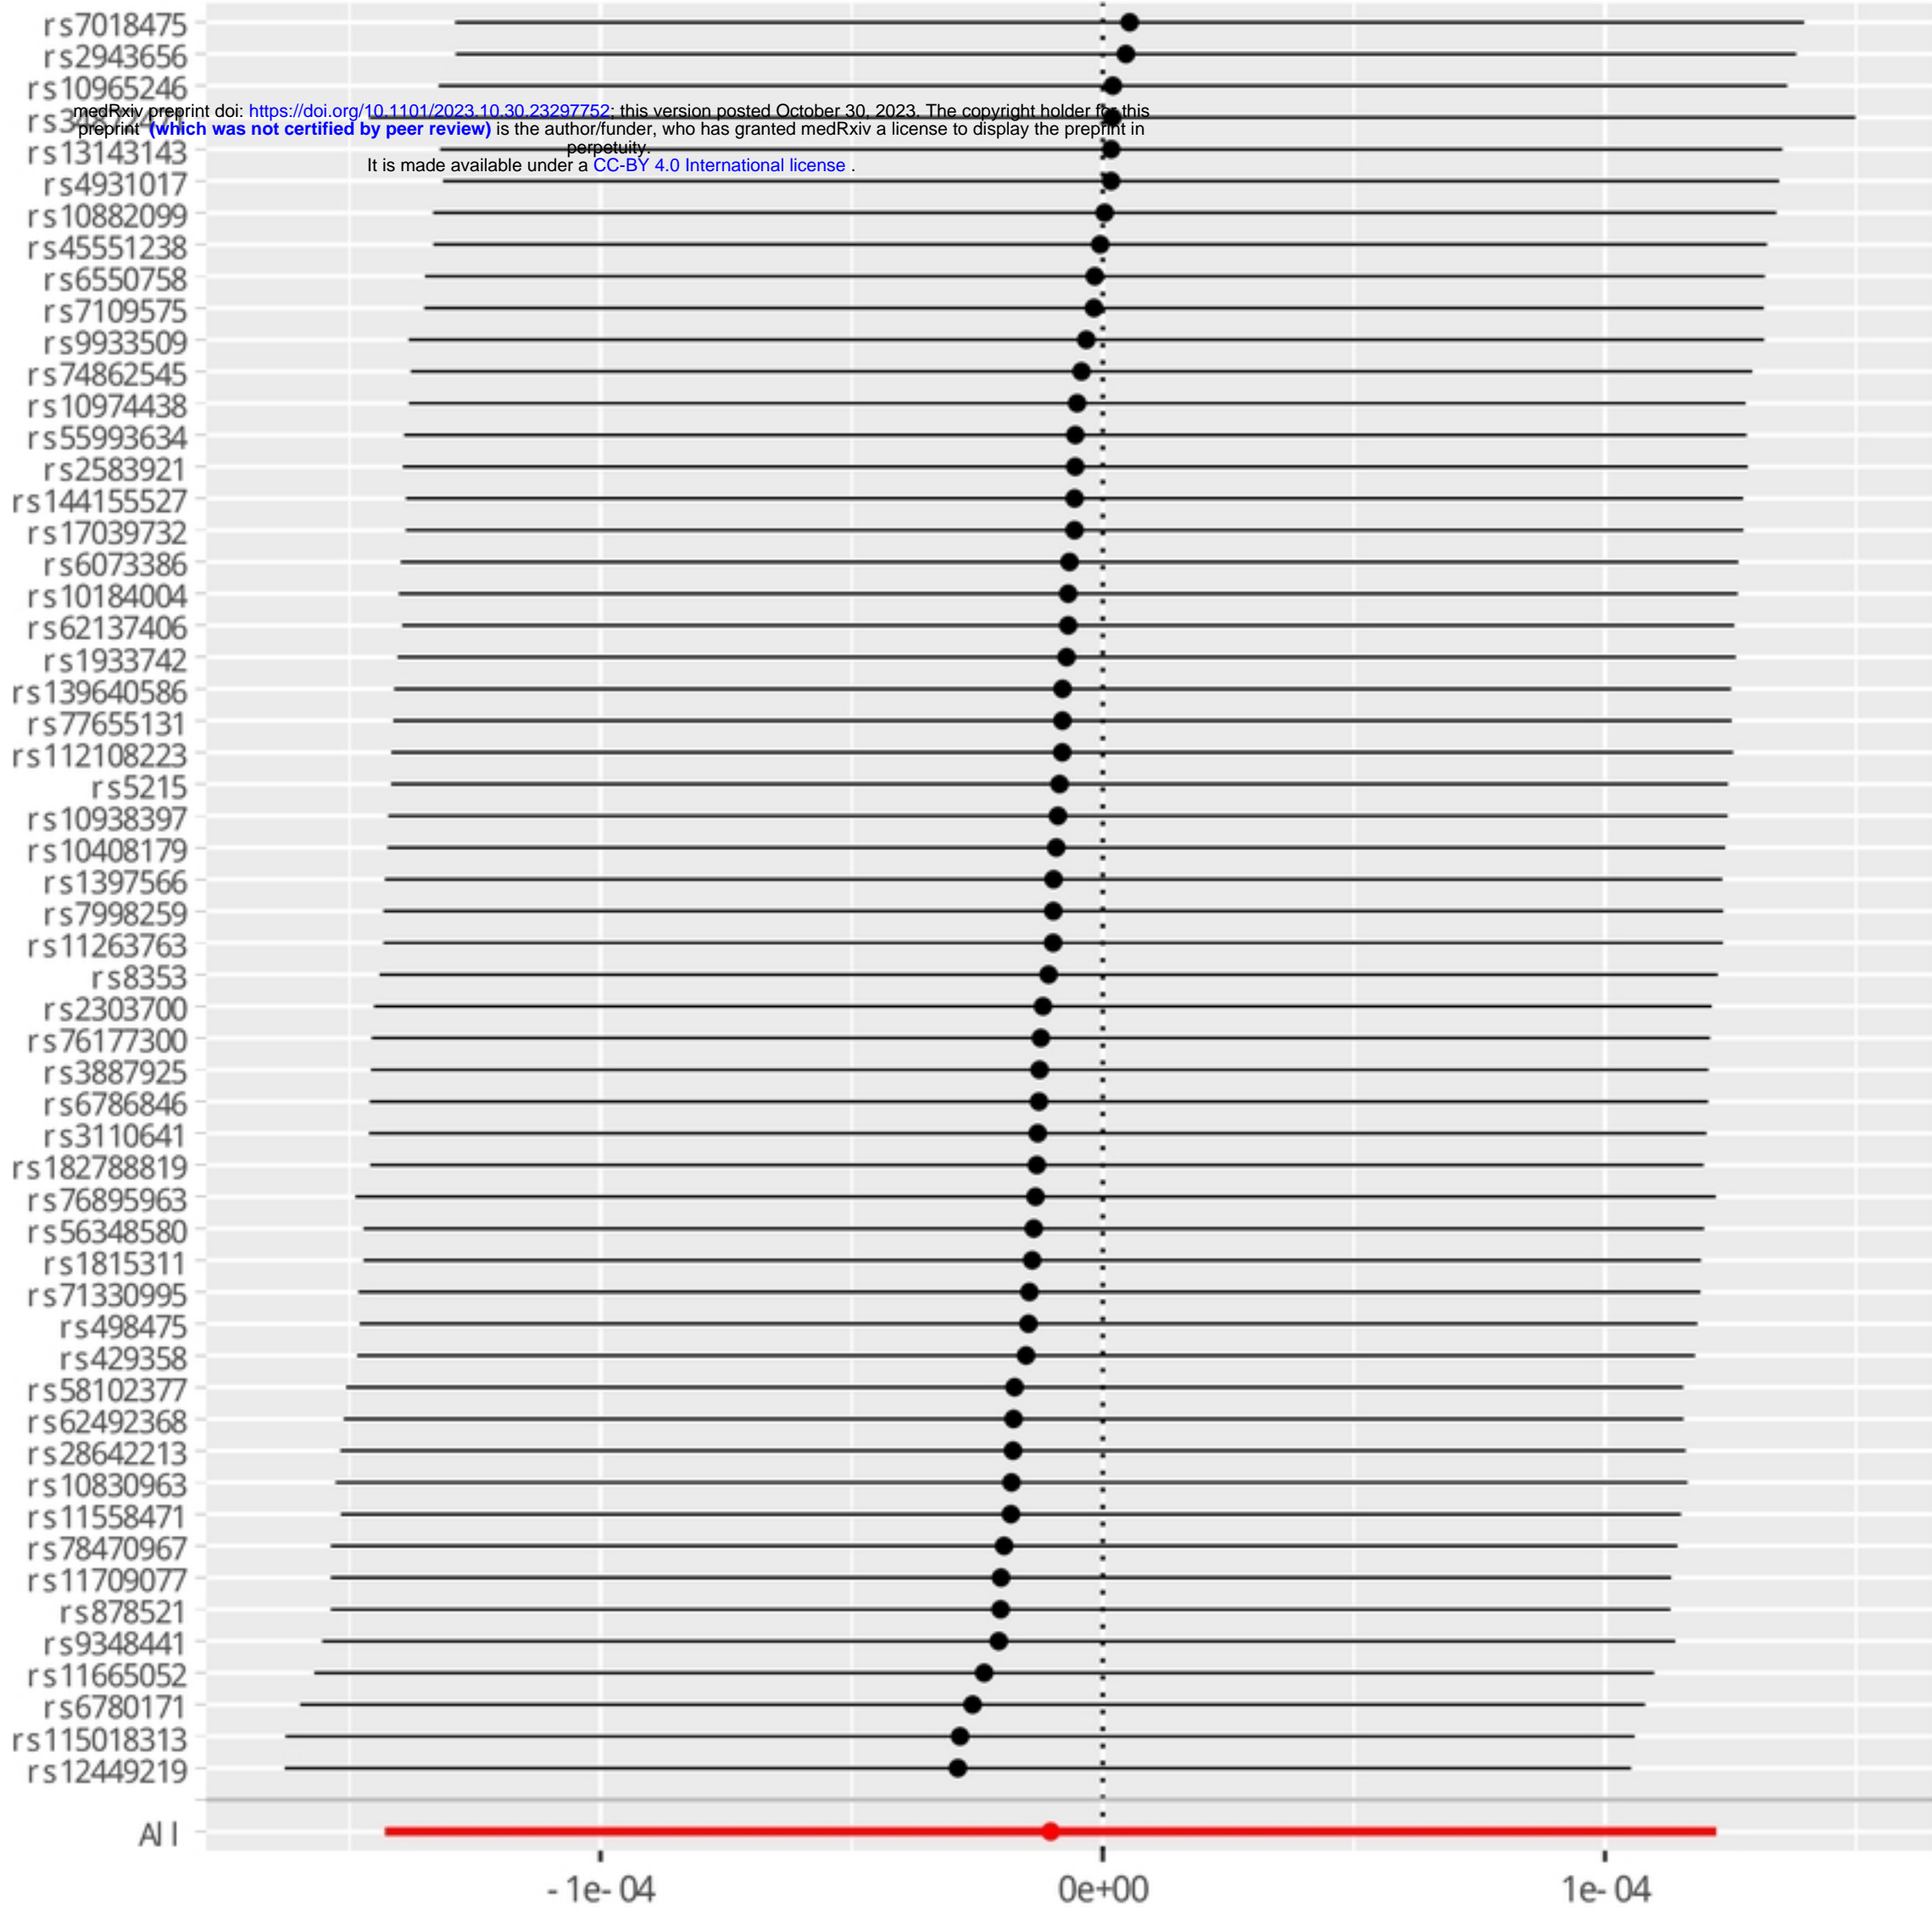

MR leave-one-out sensitivity analysis for 'Type 2 diabetes || id: finn-b-E4\_DM2' on 'Nbn-cancer illness code self-reported: vitiligo || id: ukb-a-115'

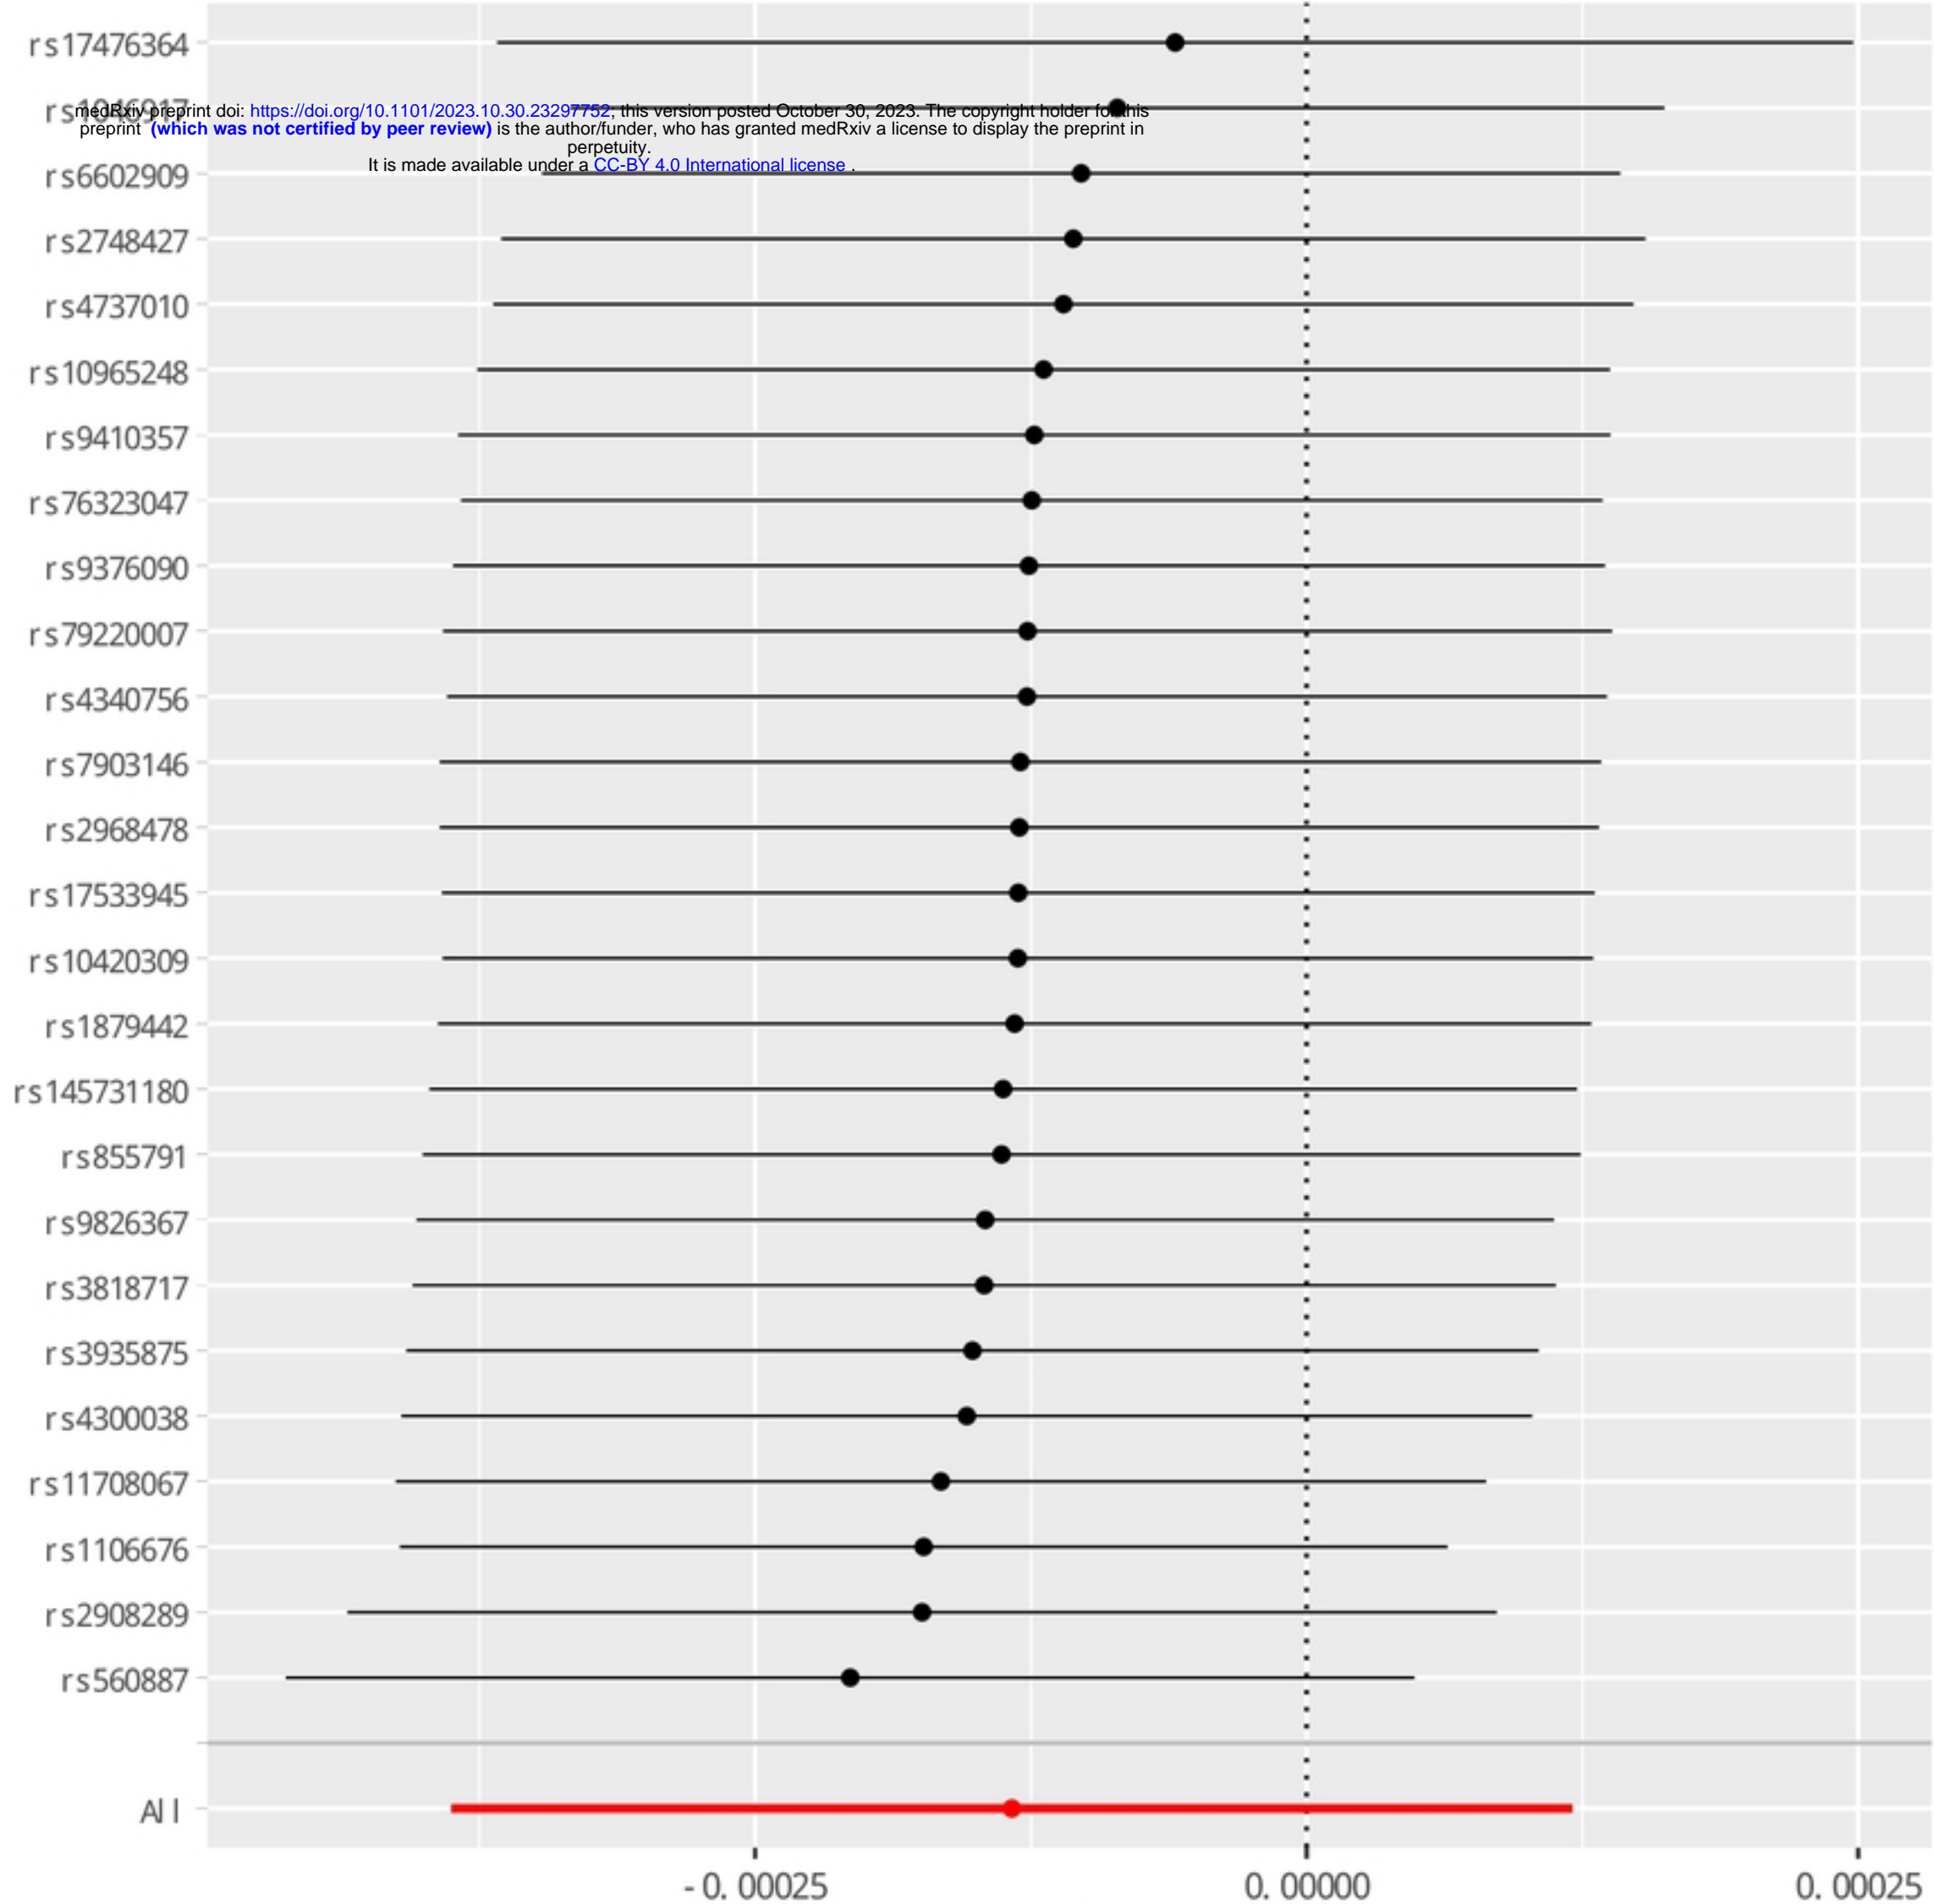

MR leave-one-out sensitivity analysis for 'HbA1c || id:ieu-b-4842' on 'Nbn-cancer illness code self-reported: vitiligo || id:ukb-a-115'



medRxiv preprint doi: <https://doi.org/10.1101/2023.10.30.23297752>; this version posted October 30, 2023. The copyright holder for this preprint (which was not certified by peer review) is the author/funder, who has granted medRxiv a license to display the preprint in perpetuity. It is made available under a [CC-BY 4.0 International license](https://creativecommons.org/licenses/by/4.0/).

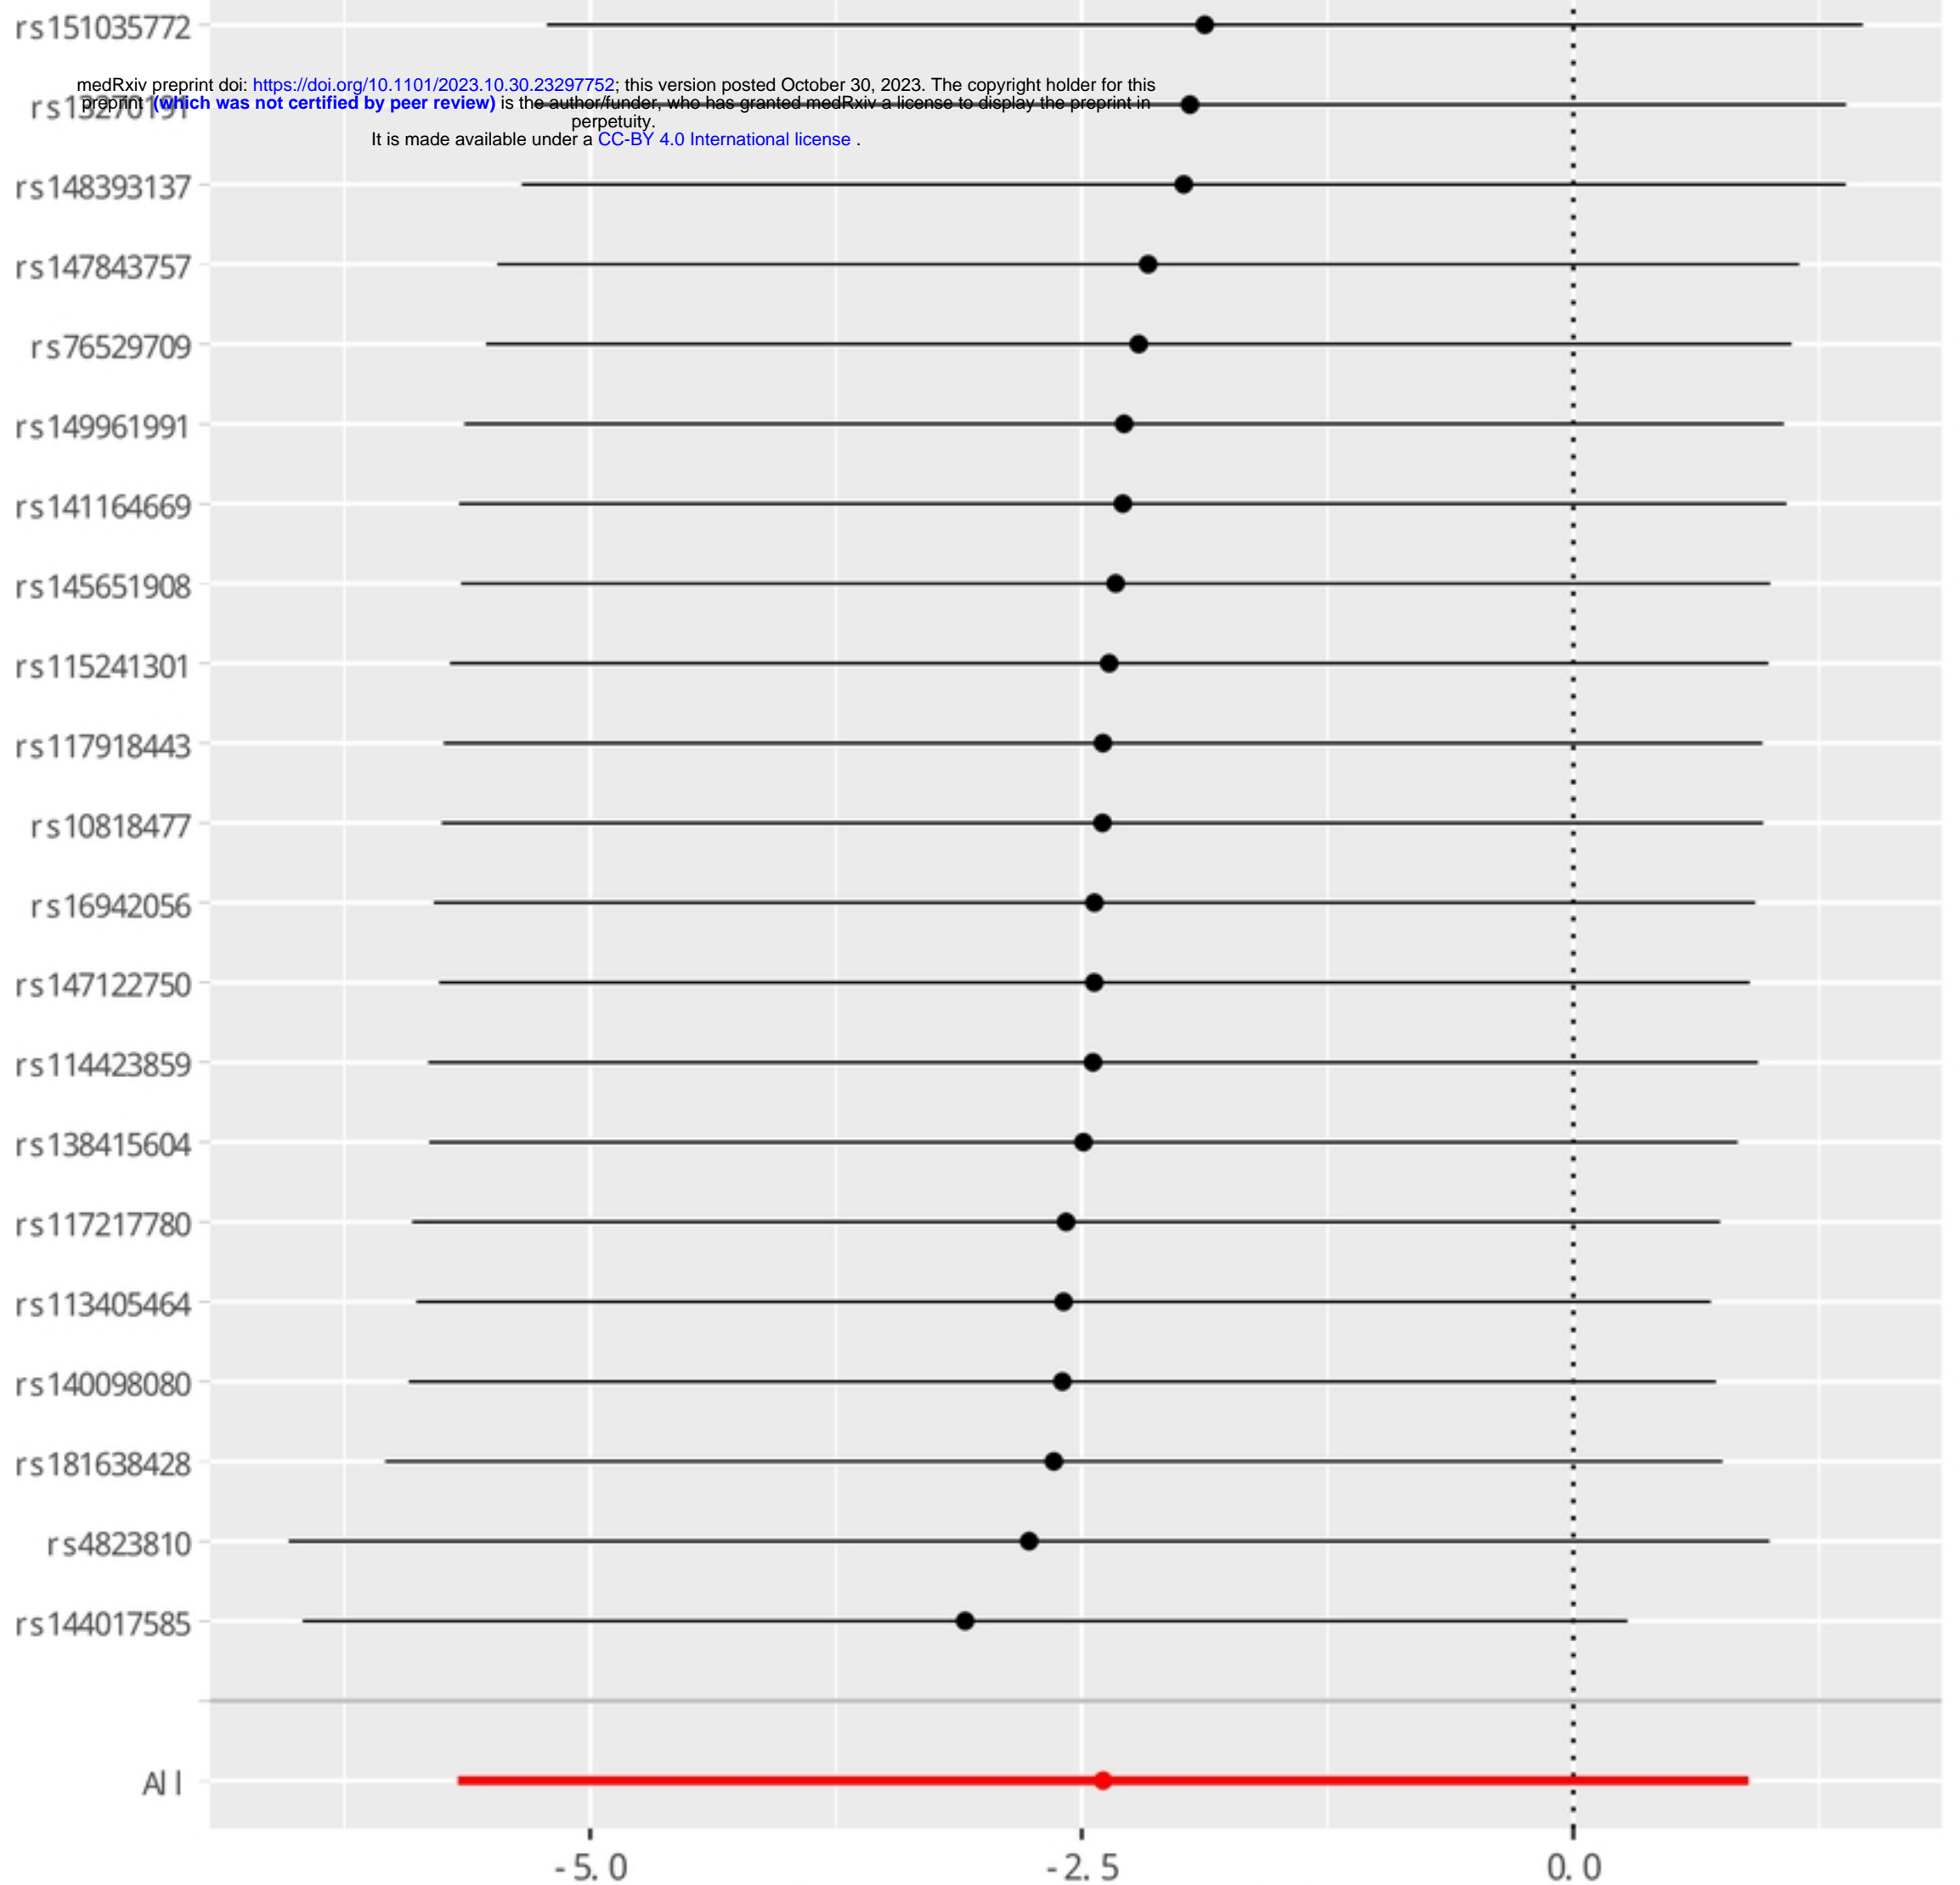

MR leave-one-out sensitivity analysis for 'Nbn-cancer illness code self-reported: vitiligo || id:ukb-a-115' on 'Fasting glucose || id:ebi-a-GCST90002232'

medRxiv preprint doi: <https://doi.org/10.1101/2023.10.30.23297752>; this version posted October 30, 2023. The copyright holder for this preprint (which was not certified by peer review) is the author/funder, who has granted medRxiv a license to display the preprint in perpetuity. It is made available under a [CC-BY 4.0 International license](https://creativecommons.org/licenses/by/4.0/).

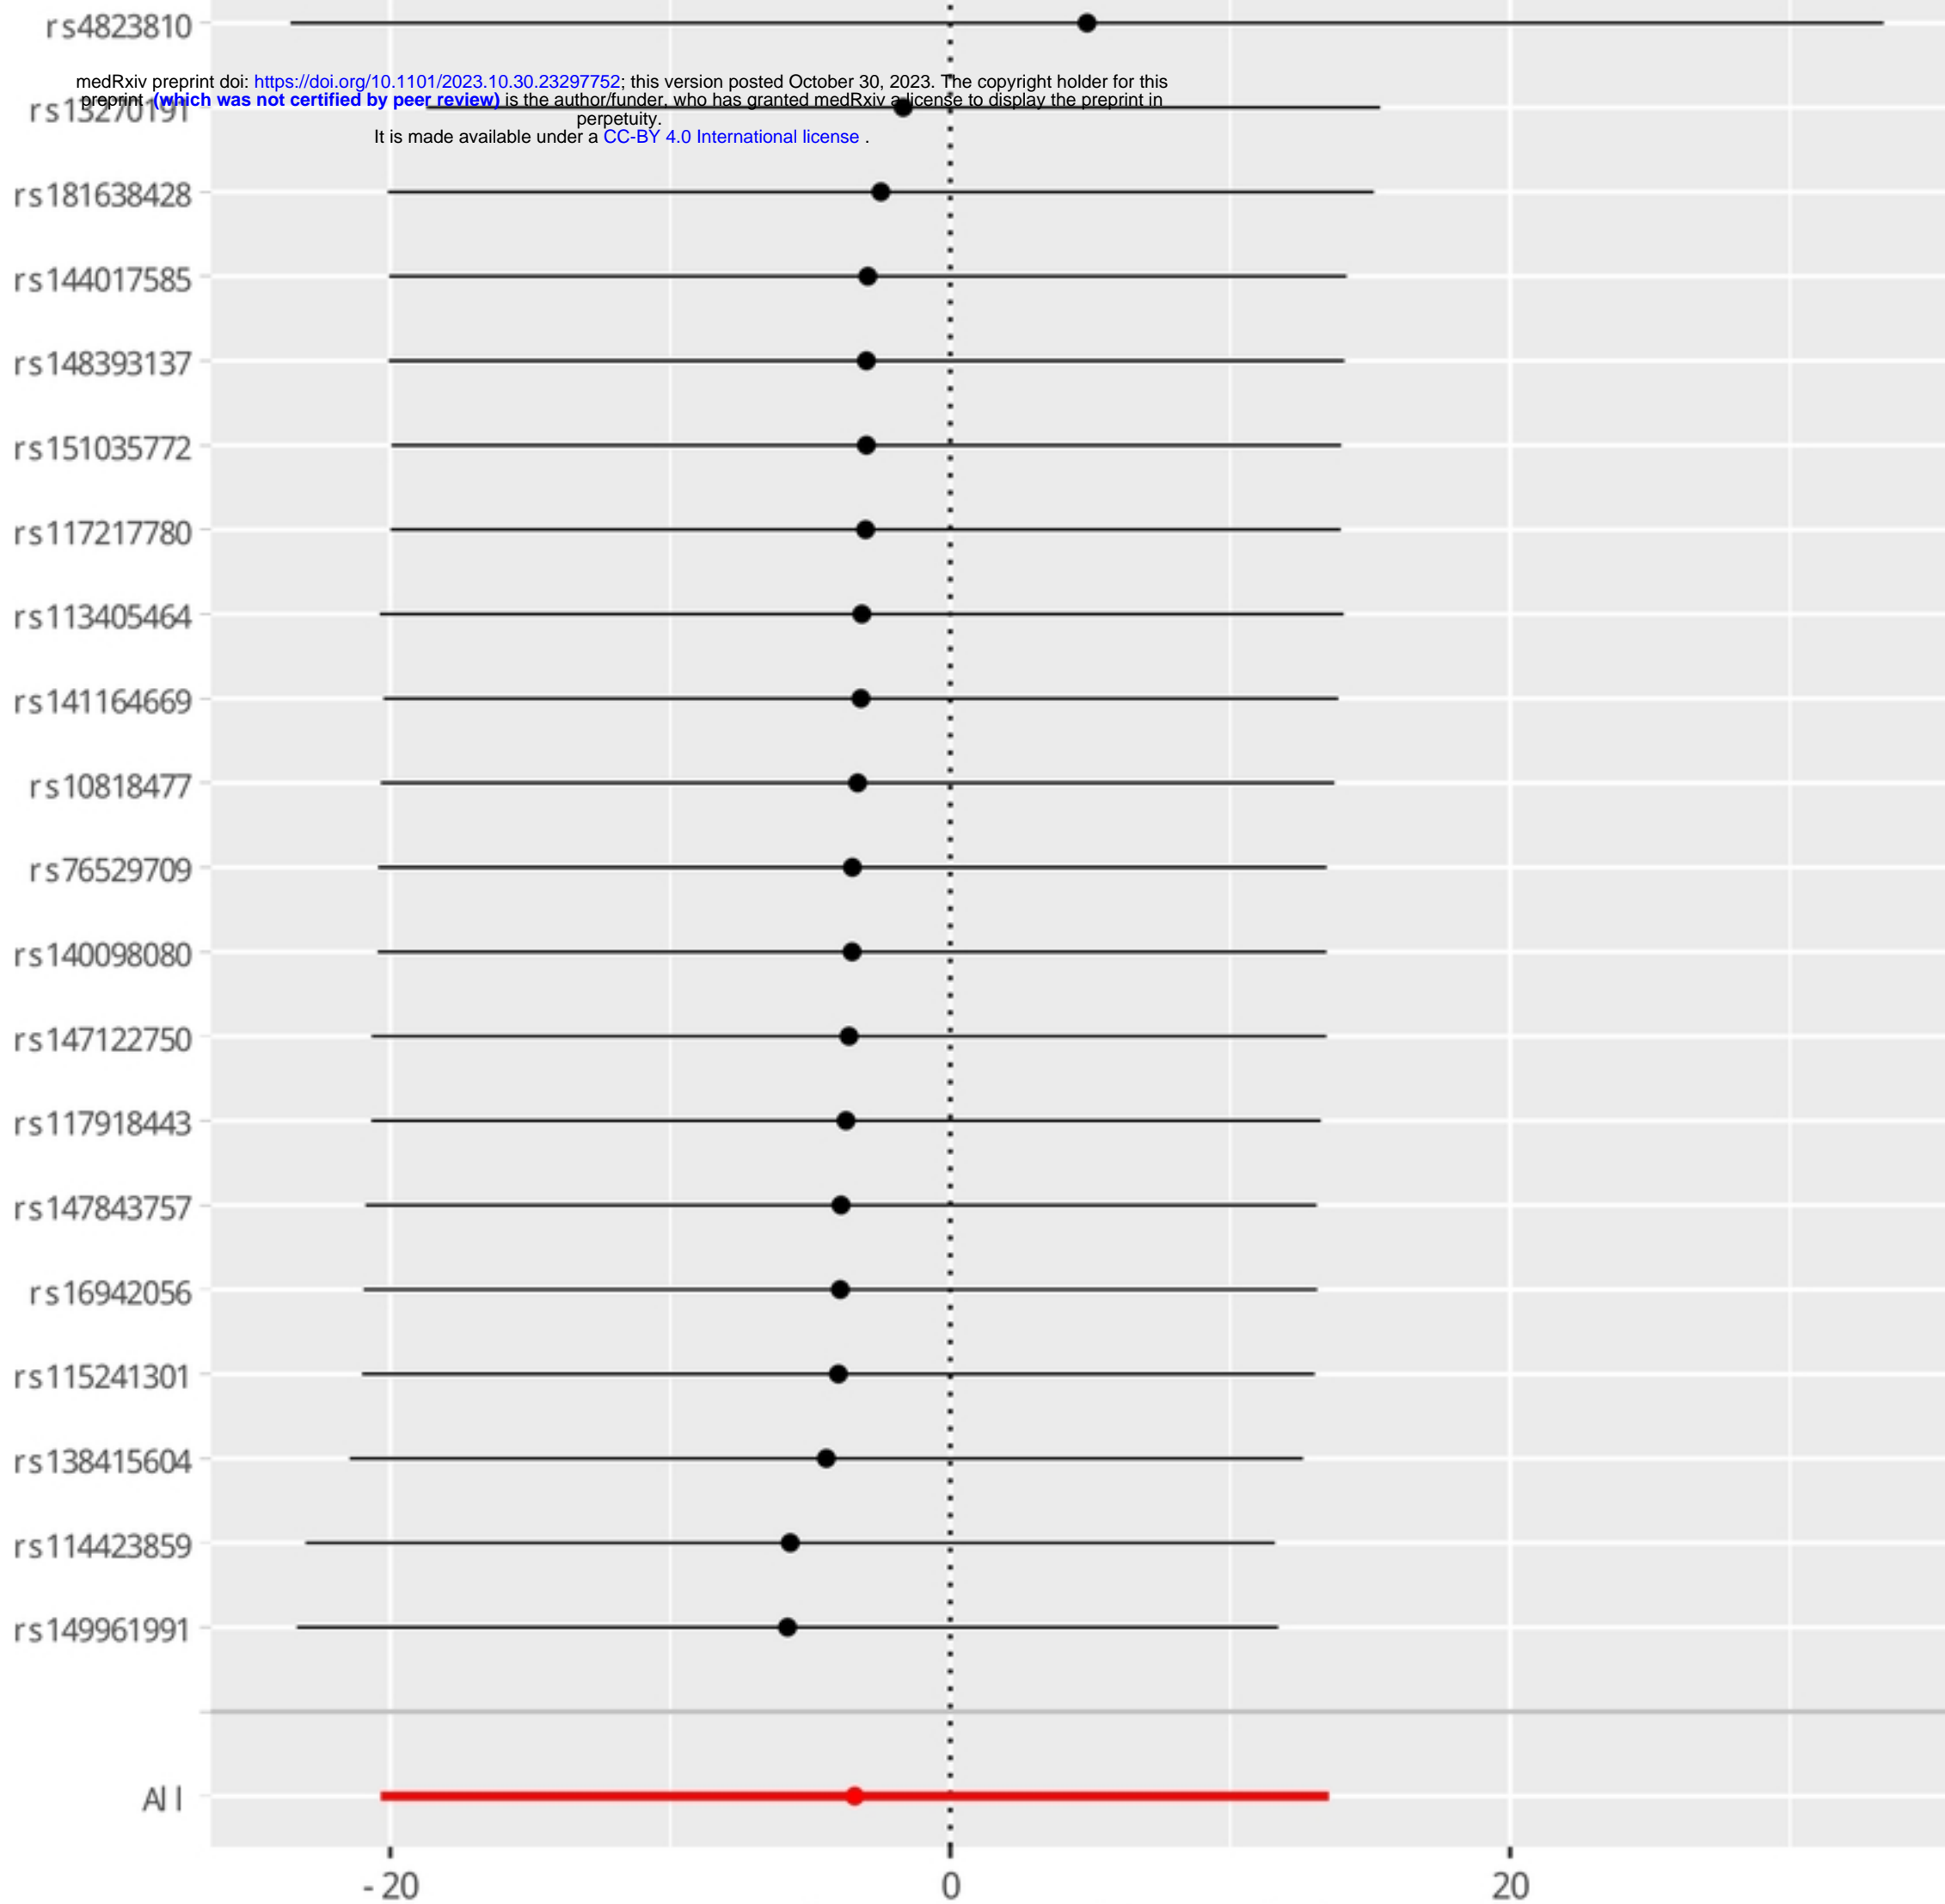

medRxiv preprint doi: <https://doi.org/10.1101/2023.10.30.23297752>; this version posted October 30, 2023. The copyright holder for this preprint (which was not certified by peer review) is the author/funder, who has granted medRxiv a license to display the preprint in perpetuity. It is made available under a [CC-BY 4.0 International license](https://creativecommons.org/licenses/by/4.0/).

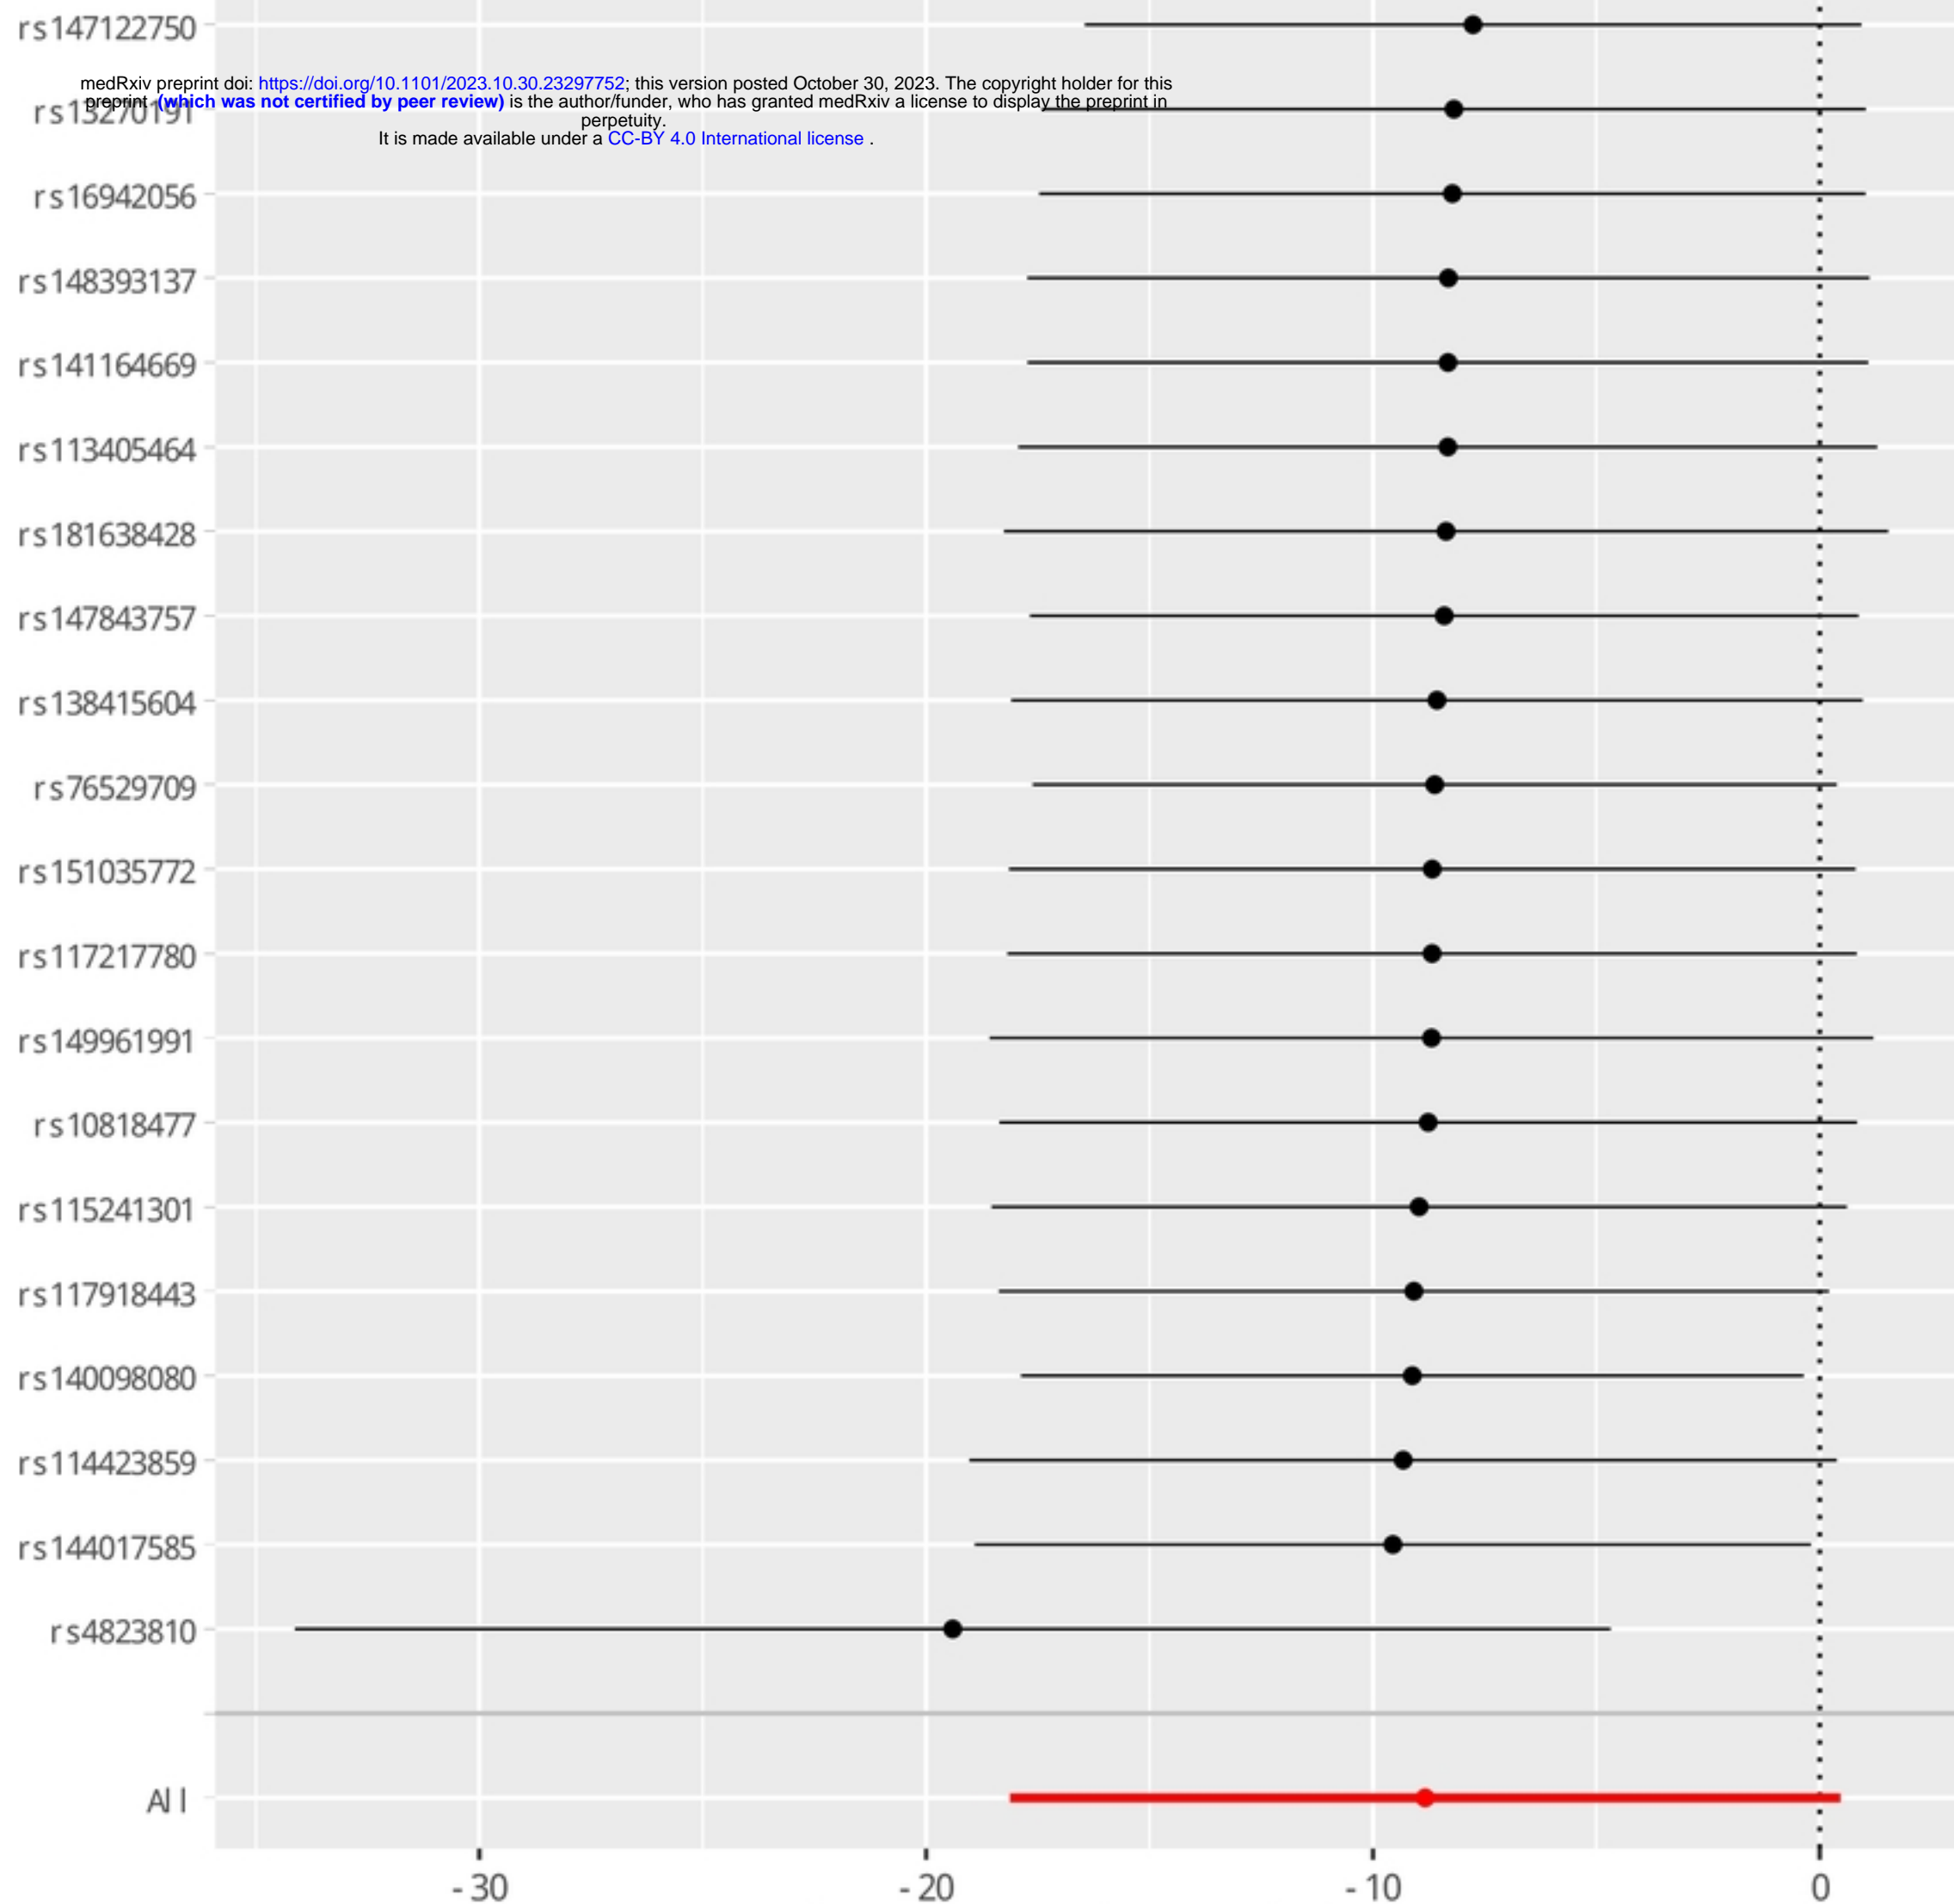

medRxiv preprint doi: <https://doi.org/10.1101/2023.10.30.23297752>; this version posted October 30, 2023. The copyright holder for this preprint (which was not certified by peer review) is the author/funder, who has granted medRxiv a license to display the preprint in perpetuity. It is made available under a [CC-BY 4.0 International license](https://creativecommons.org/licenses/by/4.0/).

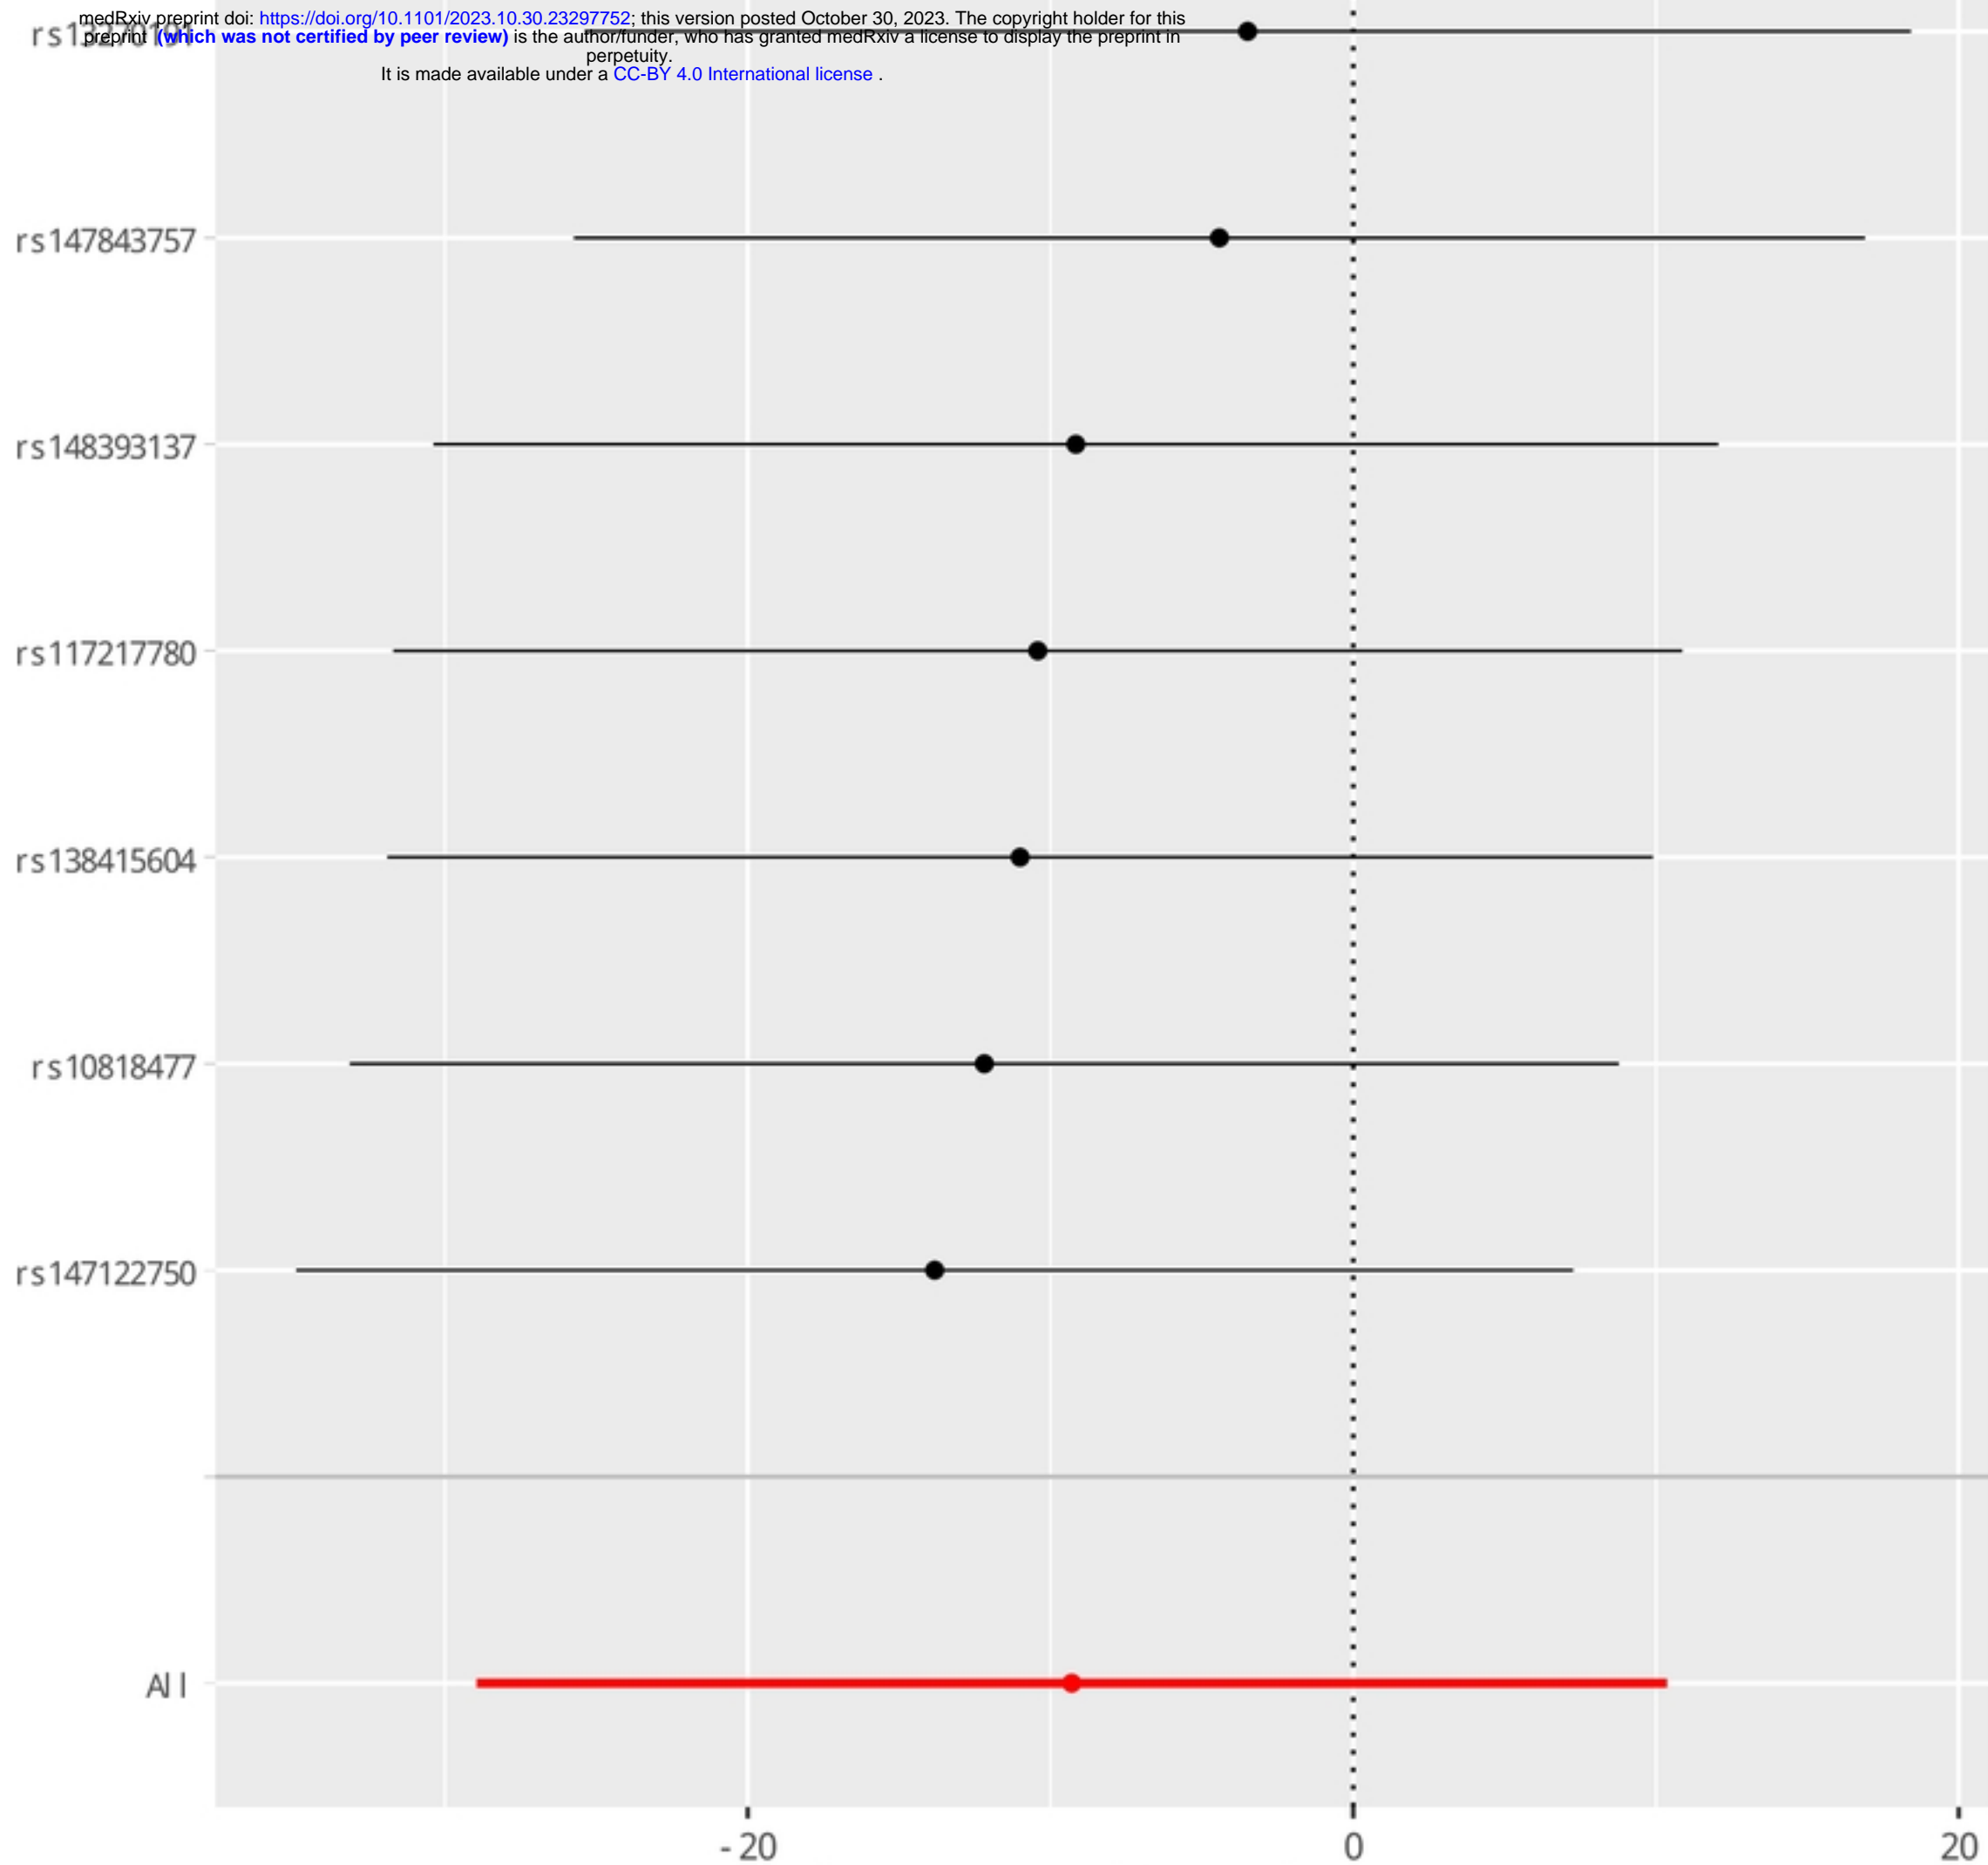

MR leave-one-out sensitivity analysis for  
'Nbn-cancer illness code self-reported: vitiligo || id:ukb-a-115' on 'HbA1c || id:ieu-b-4842'
